# Supplementary material for: A systematic catalog of studies on fetal heart rate pattern and neonatal outcome variables
Source: publisher site journal article supplement (doi:10.1515/jpm-2024-0364), 2024-10-24
Supplement: Supplementary file 1 [file j_jpm-2024-0364_suppl_001.docx]

**Supplementary data 1**

| **Database searched** | **via** | **Years of coverage** | **Records** | **Records after duplicates removed** |
| --- | --- | --- | --- | --- |
| Embase | Embase.com | 1971 - Present | 4650 | 4579 |
| Medline ALL | Ovid | 1946 - Present | 2574 | 647 |
| Web of Science Core Collection* | Web of Knowledge | 1975 - Present | 1896 | 382 |
| Cochrane Central Register of Controlled Trials** | Wiley | 1992 - Present | 343 | 60 |
| CINAHL | EBSCO | 1982 - Present | 1036 | 211 |
| **Total** | | | **10499** | **5883** |

*Science Citation Index Expanded (1975-present) ; Social Sciences Citation Index (1975-present) ; Arts & Humanities Citation Index (1975-present) ; Conference Proceedings Citation Index- Science (1990-present) ; Conference Proceedings Citation Index- Social Science & Humanities (1990-present) ; Emerging Sources Citation Index (2015-present)

** Manually deleted abstracts from trial registries

No other database limits were used than those specified in the search strategies

**embase.com**

('fetus heart rate'/de OR 'fetal heart monitor'/exp OR 'fetus electrocardiography'/de OR (('fetus monitoring'/de OR 'fetal monitor'/de OR 'fetus distress'/de OR fetus/de) AND ('heart arrhythmia'/exp OR 'heart rate and rhythm'/exp OR cardiotocography/de OR electrocardiography/de OR 'electrocardiography monitoring'/de)) OR (((fetus* OR fetal OR foetus* OR foetal OR intrauterine* OR intra-uterine* OR antenatal* OR ante-natal*) NEAR/6 (heart-rate* OR heart-beat* OR heart-monitor* OR cardiac-rate* OR heart-rhythm* OR cardiac-rhythm* OR cardiac-monitor* OR heartrate* OR arrhythm* OR cardiotocogra* OR electrocardiogra*))):Ab,ti) AND ((newborn/exp AND ('heart rate'/de OR sepsis/exp OR 'outcome assessment'/de OR 'necrotizing enterocolitis'/de OR 'brain hemorrhage'/de)) OR 'newborn assessment'/de OR 'pregnancy outcome'/de OR 'newborn morbidity'/de OR 'neonatal intensive care unit'/de OR 'neonatal intensive care'/de OR 'infantile spasm'/exp OR 'cerebral palsy'/de OR 'infantile epilepsy'/de OR (((newborn* OR new-born OR neonat* OR perinatal*) NEAR/6 (heart-rate* OR heart-beat* OR heart-rhythm* OR heart-monitor* OR cardiac-rate* OR cardiac-rhythm* OR cardiac-monitor* OR heartrate* OR sepsis* OR septic* OR outcome* OR necrot*-enterocol* OR brain-hemorrh* OR intraventric*-hemorrh* OR intracranial*-hemorrh* OR intra-ventric*-hemorrh* OR intra-cranial*-hemorrh* OR Cardiorespirogra* OR condition* OR assessment* OR morbidit* OR intensive-care)) OR nicu OR nicus OR (pregnancy NEAR/3 outcome*) OR ((infantile* OR neonat*) NEAR/3 (spasm* OR epileps* OR seizure* OR encephalopath*)) OR (cerebral* NEAR/3 (pals* OR paralys*))):ab,ti) NOT ([animals]/lim NOT [humans]/lim) NOT [conference abstract]/lim AND [english]/lim

**Medline ALL Ovid**

(((Fetal Monitoring/ OR Fetus/) AND (exp Arrhythmias, Cardiac/ OR Cardiotocography/ OR Electrocardiography/)) OR (((fetus* OR fetal OR foetus* OR foetal OR intrauterine* OR intra-uterine* OR antenatal* OR ante-natal*) ADJ6 (heart-rate* OR heart-beat* OR heart-monitor* OR cardiac-rate* OR heart-rhythm* OR cardiac-rhythm* OR cardiac-monitor* OR heartrate* OR arrhythm* OR cardiotocogra* OR electrocardiogra*))).ab,ti.) AND ((Infant, Newborn/ AND (Heart Rate/ OR Sepsis/ OR Outcome Assessment, Health Care/ OR Enterocolitis, Necrotizing/ OR Intracranial Hemorrhages/)) OR Neonatal Screening/ OR Pregnancy Outcome/ OR newborn morbidity/ OR Intensive Care Units, Neonatal/ OR Intensive Care, Neonatal/ OR Spasms, Infantile / OR Cerebral Palsy / OR (((newborn* OR new-born OR neonat* OR perinatal*) ADJ6 (heart-rate* OR heart-beat* OR heart-rhythm* OR heart-monitor* OR cardiac-rate* OR cardiac-rhythm* OR cardiac-monitor* OR heartrate* OR sepsis* OR septic* OR outcome* OR necrot*-enterocol* OR brain-hemorrh* OR intraventric*-hemorrh* OR intracranial*-hemorrh* OR intra-ventric*-hemorrh* OR intra-cranial*-hemorrh* OR Cardiorespirogra* OR condition* OR assessment* OR morbidit* OR intensive-care)) OR nicu OR nicus OR (pregnancy ADJ3 outcome*) OR ((infantile* OR neonat*) ADJ3 (spasm* OR epileps* OR seizure* OR encephalopath*)) OR (cerebral* ADJ3 (pals* OR paralys*))).ab,ti.) NOT (exp animals/ NOT humans/) AND english.la.

**Web of science Core Collection**

TS=(((((fetus* OR fetal OR foetus* OR foetal OR intrauterine* OR intra-uterine* OR antenatal* OR ante-natal*) NEAR/5 (heart-rate* OR heart-beat* OR heart-monitor* OR cardiac-rate* OR heart-rhythm* OR cardiac-rhythm* OR cardiac-monitor* OR heartrate* OR arrhythm* OR cardiotocogra* OR electrocardiogra*)))) AND ((((newborn* OR new-born OR neonat* OR perinatal*) NEAR/5 (heart-rate* OR heart-beat* OR heart-rhythm* OR heart-monitor* OR cardiac-rate* OR cardiac-rhythm* OR cardiac-monitor* OR heartrate* OR sepsis* OR septic* OR outcome* OR necrot*-enterocol* OR brain-hemorrh* OR intraventric*-hemorrh* OR intracranial*-hemorrh* OR intra-ventric*-hemorrh* OR intra-cranial*-hemorrh* OR Cardiorespirogra* OR condition* OR assessment* OR morbidit* OR intensive-care)) OR nicu OR nicus OR (pregnancy NEAR/2 outcome*) OR ((infantile* OR neonat*) NEAR/2 (spasm* OR epileps* OR seizure* OR encephalopath*)) OR (cerebral* NEAR/2 (pals* OR paralys*))))) AND LA=(english)

**Cochrane CENTRAL register of Trials**

((((fetus* OR fetal OR foetus* OR foetal OR intrauterine* OR intra-uterine* OR antenatal* OR ante-natal*) NEAR/6 (heart-rate* OR heart-beat* OR heart-monitor* OR cardiac-rate* OR heart-rhythm* OR cardiac-rhythm* OR cardiac-monitor* OR heartrate* OR arrhythm* OR cardiotocogra* OR electrocardiogra*))):Ab,ti) AND ((((newborn* OR new-born OR neonat* OR perinatal*) NEAR/6 (heart-rate* OR heart-beat* OR heart-rhythm* OR heart-monitor* OR cardiac-rate* OR cardiac-rhythm* OR cardiac-monitor* OR heartrate* OR sepsis* OR septic* OR outcome* OR necrot* NEXT enterocol* OR brain-hemorrh* OR intraventric* NEXT hemorrh* OR intracranial* NEXT hemorrh* OR intra-ventric* NEXT hemorrh* OR intra-cranial* NEXT hemorrh* OR Cardiorespirogra* OR condition* OR assessment* OR morbidit* OR intensive-care)) OR nicu OR nicus OR (pregnancy NEAR/3 outcome*) OR ((infantile* OR neonat*) NEAR/3 (spasm* OR epileps* OR seizure* OR encephalopath*)) OR (cerebral* NEAR/3 (pals* OR paralys*))):ab,ti)

**CINAHL EBSCOhost**

(((MH Fetal Monitoring+ OR MH Fetus+) AND (MH Arrhythmia + OR MH Cardiotocography OR MH Electrocardiography)) OR TI(((fetus* OR fetal OR foetus* OR foetal OR intrauterine* OR intra-uterine* OR antenatal* OR ante-natal*) N5 (heart-rate* OR heart-beat* OR heart-monitor* OR cardiac-rate* OR heart-rhythm* OR cardiac-rhythm* OR cardiac-monitor* OR heartrate* OR arrhythm* OR cardiotocogra* OR electrocardiogra*))) OR AB(((fetus* OR fetal OR foetus* OR foetal OR intrauterine* OR intra-uterine* OR antenatal* OR ante-natal*) N5 (heart-rate* OR heart-beat* OR heart-monitor* OR cardiac-rate* OR heart-rhythm* OR cardiac-rhythm* OR cardiac-monitor* OR heartrate* OR arrhythm* OR cardiotocogra* OR electrocardiogra*)))) AND ((MH Infant, Newborn AND (MH Heart Rate OR MH Sepsis OR MH "Outcomes (Health Care)" OR MH Enterocolitis, Necrotizing OR MH Intracranial Hemorrhage)) OR MH Neonatal Assessment OR MH Pregnancy Outcomes OR MH Intensive Care Units, Neonatal OR MH Intensive Care, Neonatal OR MH Spasms, Infantile + OR MH Cerebral Palsy + OR TI(((newborn* OR new-born OR neonat* OR perinatal*) N5 (heart-rate* OR heart-beat* OR heart-rhythm* OR heart-monitor* OR cardiac-rate* OR cardiac-rhythm* OR cardiac-monitor* OR heartrate* OR sepsis* OR septic* OR outcome* OR necrot*-enterocol* OR brain-hemorrh* OR intraventric*-hemorrh* OR intracranial*-hemorrh* OR intra-ventric*-hemorrh* OR intra-cranial*-hemorrh* OR Cardiorespirogra* OR condition* OR assessment* OR morbidit* OR intensive-care)) OR nicu OR nicus OR (pregnancy N2 outcome*) OR ((infantile* OR neonat*) N2 (spasm* OR epileps* OR seizure* OR encephalopath*)) OR (cerebral* N2 (pals* OR paralys*))) OR AB(((newborn* OR new-born OR neonat* OR perinatal*) N5 (heart-rate* OR heart-beat* OR heart-rhythm* OR heart-monitor* OR cardiac-rate* OR cardiac-rhythm* OR cardiac-monitor* OR heartrate* OR sepsis* OR septic* OR outcome* OR necrot*-enterocol* OR brain-hemorrh* OR intraventric*-hemorrh* OR intracranial*-hemorrh* OR intra-ventric*-hemorrh* OR intra-cranial*-hemorrh* OR Cardiorespirogra* OR condition* OR assessment* OR morbidit* OR intensive-care)) OR nicu OR nicus OR (pregnancy N2 outcome*) OR ((infantile* OR neonat*) N2 (spasm* OR epileps* OR seizure* OR encephalopath*)) OR (cerebral* N2 (pals* OR paralys*)))) NOT (MH animals+ NOT MH humans) AND LA english
