# Supplementary material for: A systematic catalog of studies on fetal heart rate pattern and neonatal outcome variables
Source: publisher site journal article supplement (doi:10.1515/jpm-2024-0364), 2024-10-24
Supplement: Supplementary file 2 [file j_jpm-2024-0364_suppl_002.docx]

**Table S1. Reason for articles exclusion after full text screening**

| **Author names, year of publication, title, journal** | **Reason for exclusion** |
| --- | --- |
| Adamson, S. J., Alessandri, L. M., Badawi, N., Burton, P. R., Pemberton, P. J., & Stanley, F. (1995). Predictors of neonatal encephalopathy in full term infants. Bmj, 311(7005), 598-602. | Aim / does not address our research question; no neonatal outcome of interest |
| Ahn, M. O., Korst, L. M., Phelan, J. P., & Martin, G. I. (1998). Does the onset of neonatal seizures correlate with the timing of fetal neurologic injury?. Clinical pediatrics, 37(11), 673-676. | Aim / does not address our research question; no neonatal outcome of interest |
| Aina-Mumuney, A. J., Althaus, J. E., Henderson, J. L., Blakemore, M. C., Johnson, E. A., & Graham, E. M. (2007). Intrapartum electronic fetal monitoring and the identification of systemic fetal inflammation. The Journal of Reproductive Medicine, 52(9), 762-768. | Aim / does not address our research question; cases neonatal sepsis n = 9 |
| Alfirevic, Z., Gyte, G. M., Cuthbert, A., & Devane, D. (2017). Continuous cardiotocography (CTG) as a form of electronic fetal monitoring (EFM) for fetal assessment during labour. Cochrane database of systematic reviews, (2). | Article type; review |
| Alper, B.S. (2007) Evidence-based medicine. Continuous cardiotocography may reduce neonatal seizures. Clinical;10(5): 161-161. | Article type; brief item |
| Althaus, J. E., Petersen, S. M., Fox, H. E., Holcroft, C. J., & Graham, E. M. (2005). Can electronic fetal monitoring identify preterm neonates with cerebral white matter injury?. Obstetrics & Gynecology, 105(3), 458-465. | Aim / does not address our research question; no neonatal outcome of interest |
| Amer-Wåhlin, I., Bördahl, P., Eikeland, T., Hellsten, C., Noren, H., Sörnes, T., & Rosen, K. G. (2002). ST analysis of the fetal electrocardiogram during labor: Nordic observational multicenter study. The Journal of Maternal-Fetal & Neonatal Medicine, 12(4), 260-266. | Aim / does not address our research question; st analysis |
| Ananth, C. V., Chauhan, S. P., Chen, H. Y., D’Alton, M. E., & Vintzileos, A. M. (2013). Electronic fetal monitoring in the United States: temporal trends and adverse perinatal outcomes. Obstetrics & Gynecology, 121(5), 927-933. | Aim / does not address our research question; trends in EFM use and changes in CS delivery rate and neonatal morbidiy and mortality |
| Aruna, V., & Abhilasha, G. (2013). Cardiotocography during labour and its relation with neonatal outcome. Journal of Evolution of Medical and Dental Sciences, 2(9), 1402-1408. | Aim / does not address our research question; no neonatal outcome of interest |
| Ayati, S., Pourali, L., Jeddi, L., Mirteimouri, M., Vatanchi, A., Salehi, M., & Hasanzadeh, E. (2020). Neonatal Outcomes of Continues Fetal Heart Rate Monitoring in Low-Risk Pregnant Women During Labor. Acta Medica Iranica. | Aim / does not address our research question; cCTG vs IA |
| Ayoubi, J. M., Audibert, F., Boithias, C., Zupan, V., Taylor, S., Bosson, J. L., & Frydman, R. (2002). Perinatal factors affecting survival and survival without disability of extreme premature infants at two years of age. European Journal of Obstetrics & Gynecology and Reproductive Biology, 105(2), 124-131. | Aim / does not address our research question; no neonatal outcome of interest |
| Ayres-de-Campos, D., Costa-Santos, C., Bernardes, J., & SisPorto® Multicentre Validation Study Group. (2005). Prediction of neonatal state by computer analysis of fetal heart rate tracings: the antepartum arm of the SisPorto® multicentre validation study. European Journal of Obstetrics & Gynecology and Reproductive Biology, 118(1), 52-60. | Aim / does not address our research question; HIE cases n = 2 |
| Badawi, N., Kurinczuk, J. J., Keogh, J. M., Alessandri, L. M., O'Sullivan, F., Burton, P. R., ... & Stanley, F. J. (1998). Antepartum risk factors for newborn encephalopathy: the Western Australian case-control study. Bmj, 317(7172), 1549-1553. | Aim / does not address our research question; no neonatal outcome of interest |
| Balayla, J., & Shrem, G. (2019). Use of artificial intelligence (AI) in the interpretation of intrapartum fetal heart rate (FHR) tracings: a systematic review and meta-analysis. Archives of gynecology and obstetrics, 300, 7-14. | Article type; review + meta-analysis |
| Barstow, C., Gauer, R., & Jamieson, B. (2010). How does electronic fetal heart rate monitoring affect labor and delivery outcomes?. | Article type; evidence based answer |
| Becker, J. H., Kuipers, L. J., Schuit, E., Visser, G. H., Van den Akker, E. S., Van Beek, E., ... & Kwee, A. (2012). Predictive value of the baseline T‐QRS ratio of the fetal electrocardiogram in intrapartum fetal monitoring: a prospective cohort study. Acta obstetricia et gynecologica scandinavica, 91(2), 189-197. | Aim / does not address our research question; ST vs neonatal outcome |
| Bilardo, C. M., Wolf, H., Stigter, R. H., Ville, Y., Baez, E., Visser, G. H. A., & Hecher, K. (2004). Relationship between monitoring parameters and perinatal outcome in severe, early intrauterine growth restriction. Ultrasound in Obstetrics and Gynecology: The Official Journal of the International Society of Ultrasound in Obstetrics and Gynecology, 23(2), 119-125. | Aim / does not address our research question; no neonatal outcome of interest |
| Boucher, M., & Yonekura, M. L. (1986). Perinatal listeriosis (early-onset): correlation of antenatal manifestations and neonatal outcome. Obstetrics and gynecology, 68(5), 593-597. | Aim / does not address our research question; no neonatal outcome of interest |
| Brady, J. P., & James, L. S. (1962). Heart rate changes in the fetus and newborn infant during labor, delivery, and the immediate neonatal period. American journal of obstetrics and gynecology, 84(1), 1-12. | Aim / does not address our research question; no statistical analysis |
| Braly, P., Garite, T., & German, J. C. (1980). Fetal heart rate patterns in infants in whom necrotizing enterocolitis develops: a preliminary report. Archives of Surgery, 115(9), 1050-1053. | Aim / does not address our research question; no statistical analysis |
| Brocklehurst, Peter, et al. Computerised interpretation of the fetal heart rate during labour: a randomised controlled trial (INFANT). Health Technology Assessment, 2018, 22.9. | Aim / does not address our research question; decision support software vs no decision support software |
| Continues | |

**Table S1. Continued**

| **Author names, year of publication, title, journal** | **Reason for exclusion** |
| --- | --- |
| Brown, J. A., Morrison, J. C., Magann, E. F., & Cefalo, R. C. (2009). Fetal extrasystole may predict poor neonatal outcome. Australian and New Zealand Journal of Obstetrics and Gynaecology, 49(4), 404-406. | Article type; case report |
| Buhimschi, C., Abdel-Razeq, S. S., Pettker, C. M., Cackovic, M., Bahtiyar, M. O., Norwitz, E. R., ... & Buhimschi, I. A. (2006). Fetal heart rate monitoring patterns (FHR-MP) to predict early-onset neonatal sepsis in utero in pregnancies complicated by intra-amniotic infection/inflammation. American Journal of Obstetrics & Gynecology, 195(6), S224. | Article type; conference abstract |
| Burrus, D. R., O'Shea Jr, T. M., Veille, J. C., & Mueller-Heubach, E. (1994). The predictive value of intrapartum fetal heart rate abnormalities in the extremely premature infant. American journal of obstetrics and gynecology, 171(4), 1128-1132. | Aim / does not address our research question; cases IVH n = 8 |
| Cahill, A. G., Tuuli, M. G., Stout, M. J., López, J. D., & Macones, G. A. (2018). A prospective cohort study of fetal heart rate monitoring: deceleration area is predictive of fetal acidemia. American journal of obstetrics and gynecology, 218(5), 523-e1. | Aim / does not address our research question; no neonatal outcome of interest |
| Cahill, A. G., Tuuli, M. G., Stout, M. J., López, J. D., & Macones, G. A. (2018). A prospective cohort study of fetal heart rate monitoring: deceleration area is predictive of fetal acidemia. American journal of obstetrics and gynecology, 218(5), 523-e1. | Duplicate |
| Chauhan, S. P., Weiner, S. J., Saade, G. R., Belfort, M. A., Reddy, U. M., Thorp Jr, J. M., ... & Human Development (NICHD) Maternal-Fetal Medicine Units (MFMU) Network. (2018). Intrapartum fetal heart rate tracing among small-for-gestational age compared with appropriate-for-gestational-age neonates. Obstetrics & Gynecology, 132(4), 1019-1025. | Aim / does not address our research question; no neonatal outcome of interest |
| Chen, H. Y., Chauhan, S. P., Ananth, C. V., Vintzileos, A. M., & Abuhamad, A. Z. (2011). Electronic fetal heart rate monitoring and its relationship to neonatal and infant mortality in the United States. American journal of obstetrics and gynecology, 204(6), 491-e1. | Aim / does not address our research question; EFM vs no EFM |
| Chuang, J., Chou, C. T., Cheng, W. C., Huang, L. W., Hwang, J. L., & Tsai, Y. L. (2004). Spontaneous fetal heart rate deceleration: an ominous sign for fetal outcome. Archives of Gynecology and Obstetrics, 269, 254-258. | Aim / does not address our research question; no neonatal outcome of interest |
| Colditz, P.B., Henderson-Smart D.J. (1990) Electronic fetal heart rate monitoring during labour: Does it prevent perinatal asphyxia and cerebral palsy? Med. J. Aust. 153 (88-90)) | Article type; review |
| Colditz, P.B., Henderson-Smart D.J. (1991) Erratum: Electronic fetal heart rate monitoring during labour: Does it prevent perinatal asphyxia and cerebral palsy? Med. J. Aust. 153 (88-90)) | Article type; erratum |
| Cole, C. (2003). Admission electronic fetal monitoring does not improve neonatal outcomes. Journal of family practice, 52(6). | Aim / does not address our research question; admission EFM vs usual-care |
| Denney, J., Holmgren, C., Henry, E., Rose, N., Jackson, M., & Esplin, S. (2009). 561: Category III fetal heart rate tracings: a rare occurrence strongly associated with adverse neonatal outcome. American Journal of Obstetrics & Gynecology, 201(6), S208-S209. | Article type; poster session |
| Dijxhoorn, M. J., Visser, G. H. A., Touwen, B. C. L., & Huisjes, H. J. (1987). Apgar score, meconium and acidaemia at birth in small‐for‐gestational age infants born at term, and their relation to neonatal neurological morbidity. BJOG: An International Journal of Obstetrics & Gynaecology, 94(9), 873-879. | Aim / does not address our research question; no neonatal outcome of interest |
| DiPietro, J. A., Kivlighan, K. T., Costigan, K. A., Rubin, S. E., Shiffler, D. E., Henderson, J. L., & Pillion, J. P. (2010). Prenatal antecedents of newborn neurological maturation. Child development, 81(1), 115-130. | Aim / does not address our research question; no neonatal outcome of interest |
| Eden, R. D., Evans, M. I., Britt, D. W., Evans, S. M., Gallagher, P., & Schifrin, B. S. (2021). Combined prenatal and postnatal prediction of early neonatal compromise risk. The Journal of Maternal-Fetal & Neonatal Medicine, 34(18), 2996-3007. | Aim / does not address our research; no info on fhr vs. nhr |
| Eden, R. D., Evans, M. I., Evans, S. M., & Schifrin, B. S. (2018). The “fetal reserve index”: re-engineering the interpretation and responses to fetal heart rate patterns. Fetal diagnosis and therapy, 43(2), 90-104. | Aim / does not address our research; no info on fhr vs. nhr |
| Ellison, P., SHERIDANPEREIRA, M., MacDonald, D., & Foster, M. (1989, September). Relations between fetal heart monitoring patterns and the neonatal neurological evaluation. In ANNALS OF NEUROLOGY (Vol. 26, No. 3, pp. 429-430). 34 BEACON STREET, BOSTON, MA 02108-1493: LITTLE BROWN CO. | Article type; conference abstract |
| Ellison, P. H., Foster, M., Sheridan-Pereira, M., & MacDonald, D. (1991). Electronic fetal heart monitoring, auscultation, and neonatal outcome. American journal of obstetrics and gynecology, 164(5), 1281-1289. | Aim / does not address our research question; no neonatal outcome of interest |
| Emory, E. K., & Noonan, J. R. (1984). Fetal cardiac responding: A correlate of birth weight and neonatal behavior. Child Development, 1651-1657. | Aim / does not address our research question; no neonatal outcome of interest |
| Emory, E. K., Walker, E. F., & Cruz, A. (1982). Fetal heart rate part II: Behavioral correlates. Psychophysiology, 19(6), 680-686. | Aim / does not address our research question; no neonatal outcome of interest |
| Farquhar, C. M., Armstrong, S., Masson, V., Thompson, J. M., & Sadler, L. (2020). Clinician identification of birth asphyxia using intrapartum cardiotocography among neonates with and without encephalopathy in New Zealand. JAMA network open, 3(2), e1921363-e1921363. | Aim / does not address our research question; no neonatal outcome of interest |
| Feldman, R. C., Tabsh, K. M., & Shields, W. D. (1985). Correlation of ominous fetal heart rate patterns and brain-specific creatine kinase. Obstetrics & Gynecology, 65(4), 476-480. | Aim / does not address our research question; no neonatal outcome of interest |

Continues

**Table S1. Continued**

| **Author names, year of publication, title, journal** | **Reason for exclusion** |
| --- | --- |
| Figueiredo, B., Pinto, T. M., Pacheco, A., & Field, T. (2017). Fetal heart rate variability mediates prenatal depression effects on neonatal neurobehavioral maturity. Biological psychology, 123, 294-301. | Aim / does not address our research question; no neonatal outcome of interest |
| Fleming, C., Riordon, T. P., Ortiz, A., & Woods Jr, J. R. (1981). Effect of Method of Delivery on Heart Rate Pattern in the Early Newborn. Clinical Pediatrics, 20(6), 408-411. | Aim / does not address our research question; no statistical analysis |
| Flynn, A. M., Kelly, J., & O'Conor, M. (1979). Unstressed antepartum cardiotocography in the management of the fetus suspected of growth retardation. BJOG: An International Journal of Obstetrics & Gynaecology, 86(2), 106-110. | Aim / does not address our research question; no neonatal outcome of interest |
| Frey, H., Liu, X., Lynch, C. D., Musindi, W., Samuels, P., Rood, K. M., ... & Landon, M. B. (2017). 678: Which fetal heart rate characteristics are associated with neonatal encephalopathy?. American Journal of Obstetrics & Gynecology, 216(1), S398-S399. | Article type; poster session |
| Frey, H., Liu, X., Lynch, C. D., Musindi, W., Samuels, P., Rood, K. M., ... & Landon, M. B. (2017). 678: Which fetal heart rate characteristics are associated with neonatal encephalopathy?. American Journal of Obstetrics & Gynecology, 216(1), S398-S399. | Duplicate |
| Frey, H. A., Liu, X., Lynch, C. D., Musindi, W., Samuels, P., Rood, K. M., ... & Landon, M. B. (2018). An evaluation of fetal heart rate characteristics associated with neonatal encephalopathy: a case‐control study. BJOG: An International Journal of Obstetrics & Gynaecology, 125(11), 1480-1487. | Aim / does not address our research question; no neonatal outcome of interest |
| Frey, H. A., Liu, X., Lynch, C. D., Musindi, W., Samuels, P., Rood, K. M., ... & Landon, M. B. (2018). An evaluation of fetal heart rate characteristics associated with neonatal encephalopathy: a case‐control study. BJOG: An International Journal of Obstetrics & Gynaecology, 125(11), 1480-1487. | Article type; editorial comment |
| Ganzevoort, W., Mensing Van Charante, N., Thilaganathan, B., Prefumo, F., Arabin, B., Bilardo, C. M., ... & Zimmermann, A. (2017). How to monitor pregnancies complicated by fetal growth restriction and delivery before 32 weeks: post‐hoc analysis of TRUFFLE study. Ultrasound in Obstetrics & Gynecology, 49(6), 769-777. | Aim / does not address our research question; no neonatal outcome of interest |
| Graham, E. M., Petersen, S. M., Christo, D. K., & Fox, H. E. (2006). Intrapartum electronic fetal heart rate monitoring and the prevention of perinatal brain injury. Obstetrics & Gynecology, 108(3 Part 1), 656-666. | Article type; review |
| Graham, E. M., Petersen, S. M., Christo, D. K., & Fox, H. E. (2006). Intrapartum electronic fetal heart rate monitoring and the prevention of perinatal brain injury. Obstetrics & Gynecology, 108(3 Part 1), 656-666. | Duplicate |
| Hauth, J. C. (2016). 197: Early intrapartum fetal heart rate patterns and neonatal outcomes in nulliparas. American Journal of Obstetrics & Gynecology, 214(1), S120-S121. | Article type; poster session |
| Herbst, A., Thorngren-Jerneck, K., Wu, L., & Ingemarsson, I. (1997). Different types of acid-base changes at birth, fetal heart rate patterns, and infant outcome at 4 years of age. Acta obstetricia et gynecologica Scandinavica, 76(10), 953-958. | Aim / does not address our research question; no neonatal outcome of interest |
| Holmes, P., Oppenheimer, L. W., Gravelle, A., Walker, M., & Blayney, M. (2001). The effect of variable heart rate decelerations on intraventricular hemorrhage and other perinatal outcomes in preterm infants. Journal of Maternal-Fetal Medicine, 10(4), 264-268. | Aim / does not address our research question; cases nec n = 2, cases ivh n=4 |
| Holmqvist, P., Svenningsen, N. W., & Ingemarsson, I. (1984). Neurodevelopmental outcome and electronic fetal heart rate monitoring in a neonatal intensive care population. Acta obstetricia et gynecologica Scandinavica, 63(6), 527-532. | Aim / does not address our research question; no neonatal outcome of interest |
| Ignatov, P. N., & Lutomski, J. E. (2016). Quantitative cardiotocography to improve fetal assessment during labor: a preliminary randomized controlled trial. European Journal of Obstetrics & Gynecology and Reproductive Biology, 205, 91-97. | Aim / does not address our research question; qCTG vs CTG + blood sampling |
| Impey, L., Reynolds, M., MacQuillan, K., Gates, S., Murphy, J., & Sheil, O. (2003). Admission cardiotocography: a randomised controlled trial. The Lancet, 361(9356), 465-470. | Aim / does not address our research question; admission CTG vs intermittent |
| Ingemarsson, I. (2009). Fetal monitoring during labor. Neonatology, 95(4), 342-346. | Article type; review |
| Ingemarsson, I., Herbst, A., & Thorngren‐Jerneck, K. (1997). Long term outcome after umbilical artery acidaemia at term birth: influence of gender and duration of fetal heart rate abnormalities. BJOG: An International Journal of Obstetrics & Gynaecology, 104(10), 1123-1127. | Aim / does not address our research question; no neonatal outcome of interest |
| Jonsson, M., Ågren, J., Nordén-Lindeberg, S., Ohlin, A., & Hanson, U. (2014). Neonatal encephalopathy and the association to asphyxia in labor. American journal of obstetrics and gynecology, 211(6), 667-e1. | Aim / does not address our research question; no neonatal outcome of interest |
| Kai, K., Sameshima, H., Ikeda, T., & Ikenoue, T. (2009). Severe variable deceleration is associated with intestinal perforation in infants born at 22–27 weeks' gestation. The Journal of Maternal-Fetal & Neonatal Medicine, 22(3), 259-264. | Aim / does not address our research question; no neonatal outcome of interest |
| Kaiser, G. (1991). Do electronic fetal heart rate monitors improve delivery outcomes?. The Journal of the Florida Medical Association, 78(5), 303-307. | Article type; review |
| Kanagal, D. V., & Praveen, B. K. (2022). Intrapartum fetal monitoring and its correlation with umbilical cord blood ph and early neonatal outcome: A prospective cohort study. Journal of South Asian Federation of Obstetrics and Gynaecology, 14(1), 63-67. | Aim / does not address our research question; no neonatal outcome of interest |
| Continues | |

**Table S1. Continued**

| **Author names, year of publication, title, journal** | **Reason for exclusion** |
| --- | --- |
| Karumuri, Tallapaka, Lakshmi, Harika. Study of fetal heart monitoring by cardiotocography in obstetric high risk and low risk pregnancy cases and its correlation to perinatal outcome. | Aim / does not address our research question; no neonatal outcome of interest |
| Kesselheim, A. S., November, M. T., Lifford, K. L., McElrath, T. F., Puopolo, A. L., Orav, E. J., & Studdert, D. M. (2010). Using malpractice claims to identify risk factors for neurological impairment among infants following non‐reassuring fetal heart rate patterns during labour. Journal of Evaluation in Clinical Practice, 16(3), 476-483. | Aim / does not address our research question; no neonatal outcome of interest |
| Kessler, J., Moster, D., & Albrechtsen, S. (2015). Intrapartum monitoring with cardiotocography and ST‐waveform analysis in breech presentation: an observational study. BJOG: An International Journal of Obstetrics & Gynaecology, 122(4), 528-535. | Aim / does not address our research question; ST waveform |
| Kobayashi, H., Yoshida, A., Kobayashi, M., Hamada, T., Noguchi, Y., & Yamada, T. (2003). A new computerized analysis to precisely evaluate heart rate variability during the nonstress test. American journal of perinatology, 20(02), 077-086. | Aim / does not address our research question; no neonatal outcome of interest |
| Kodama, Y., Ikeda, T., Sameshima, H., & Ikenoue, T. (2005). Characteristic intrapartum fetal heart rate patterns in neonates with asphyxiation-and non-asphyxiation-related cerebral palsy. American Journal of Obstetrics & Gynecology, 193(6), S180. | Article type; poster session |
| Kodama, Y., Sameshima, H., Ikeda, T., & Ikenoue, T. (2009). Intrapartum fetal heart rate patterns in infants (≥ 34 weeks) with poor neurological outcome. Early human development, 85(4), 235-238. | Aim / does not address our research question; no neonatal outcome of interest |
| Kodama, Y., Sameshima, H., Ikeda, T., & Ikenoue, T. (2019). Intrapartum fetal heart rate patterns in infants (≥ 34 weeks) with poor neurological outcome. Reprod. Sci. 2019 Vol. 26 Pages 235A-236A | Article type; scientific abstract |
| Kodama, Y., Muraoka, J., Ohashi, M., Goto, T., & Sameshima, H. (2021). Intrapartum fetal heart rate patterns and perinatal outcome in chorioamnionitis at or beyond 34 weeks of gestation. Journal of Obstetrics and Gynaecology Research, 47(3), 1110-1117. | Aim / does not address our research question; no neonatal outcome of interest |
| Kumar, N., & Yadav, M. (2022). Role of admission cardiotocography in predicting the obstetric outcome in term antenatal women: A prospective observational study. Journal of Mother and Child, 26(1), 43-49. | Aim / does not address our research question; no neonatal outcome of interest |
| Kumari, M., Abraham, A., Abraham, K., Navaneethan, P., Karuppusami, R., Sridhar, S., & Regi, A. (2023). Intrapartum electronic fetal monitoring and perinatal outcomes: Analysis of components of fetal heart rate pattern. Current Medical Issues, 21(1), 26-30. | Aim / does not address our research question; no neonatal outcome of interest |
| Lalor, J. G., Fawole, B., Alfirevic, Z., & Devane, D. (2008). Biophysical profile for fetal assessment in high risk pregnancies. Cochrane Database of Systematic Reviews, (1). | Article type; review |
| Leybovitz-Haleluya, N., Wainstock, T., Pariente, G., & Sheiner, E. (2021). Non-reassuring fetal heart rate patterns: Is it a risk factor for long-term pediatric cardiovascular diseases of the offspring?. Early Human Development, 155, 105330. | Aim / does not address our research question; no neonatal outcome of interest |
| Lien, J. M., Towers, C. V., Quilligan, E. J., De Veciana, M., Toohey, J. S., & Morgan, M. A. (1995). Term early-onset neonatal seizures: obstetric characteristics, etiologic classifications, and perinatal care. Obstetrics & Gynecology, 85(2), 163-169. | Aim / does not address our research question; no statistical analysis |
| Lobmaier, S. M., van Charante, N. M., Ferrazzi, E., Giussani, D. A., Shaw, C. J., Müller, A., ... & van Wassenaer-Leemhuis, A. (2016). Phase-rectified signal averaging method to predict perinatal outcome in infants with very preterm fetal growth restriction-a secondary analysis of TRUFFLE-trial. American journal of obstetrics and gynecology, 215(5), 630-e1. | Aim / does not address our research question; no neonatal outcome of interest |
| Locatelli, A., Lambicchi, L., Incerti, M., Bonati, F., Ferdico, M., Malguzzi, S., ... & Paterlini, G. (2020). Is perinatal asphyxia predictable?. BMC pregnancy and childbirth, 20(1), 1-8. | Aim / does not address our research question; no statistical analysis |
| Lovers, A. A., Ugwumadu, A., & Georgieva, A. (2022). Cardiotocography and clinical risk factors in early term labor: a retrospective cohort study using computerized analysis with Oxford system. Frontiers in Pediatrics, 10, 64. | Aim / does not address our research question; no neonatal outcome of interest |
| MacDonald, D., Grant, A., Sheridan-Pereira, M., Boylan, P., & Chalmers, I. (1985). The Dublin randomized controlled trial of intrapartum fetal heart rate monitoring. American journal of obstetrics and gynecology, 152(5), 524-539. | Aim / does not address our research question; EFM vs intermittent monitoring |
| Mahomed, K., Nyoni, R., Mulambo, T., Kasule, J., & Jacobus, E. (1994). Randomised controlled trial of intrapartum fetal heart rate monitoring. Bmj, 308(6927), 497-500. | Aim / does not address our research question; different types of monitoring |
| Mahomed, K., Nyoni, R., Mlambo, T., Jacobus, E. & Kasule, J. (1992). Intrapartum foetal heart rate monitoring-continuous electronic versus intermittent doppler-a randomised controlled trial. Central african journal of medicine, 38(12), 458-462. | Aim / does not address our research question; continuous vs intermittent monitoring |
| Martis, R., Emilia, O., Nurdiati, D. S., & Brown, J. (2017). Intermittent auscultation (IA) of fetal heart rate in labour for fetal well‐being. Cochrane Database of Systematic Reviews, (2). | Article type; review |
| Matsuda, Y., Maeda, T., & Kouno, S. (2005, June). Fetal/neonatal outcome in abruptio placentae during preterm gestation. In Seminars in thrombosis and hemostasis (Vol. 31, No. 03, pp. 327-333). Copyright© 2005 by Thieme Medical Publishers, Inc., 333 Seventh Avenue, New York, NY 10001, USA.. | Aim / does not address our research question; no neonatal outcome of interest |
| McKenzie, G., (2017). Computerised interpretation of fetal heart rate during labour (INFANT): a randomised controlled trial, The INFANT Collaborative Group AIMS J 2017 Vol. 29 Issue 3 Pages 20-22 | Aim / does not address our research question; decision support system vs. outcome |

Continues

**Table S1. Continued**

| **Author names, year of publication, title, journal** | **Reason for exclusion** |
| --- | --- |
| Mires, G., Goldbeck-Wood, S., Murray, G. D., Nesheim, B. I., Williams, F., & Howie, P. (2001). Randomised controlled trial of cardiotocography versus Doppler auscultation of fetal heart at admission in labour in low risk obstetric populationCommentary: changes between protocol and manuscript should be declared at submissionCommentary: research governance must focus on research trainingCommentary: Approach to power calculations has to be realistic. Bmj, 322(7300), 1457-1462. | Aim / does not address our research question; auscultation vs. ctg |
| Muraoka, J., Kodama, Y., Ohashi, M., Goto, T., & Sameshima, H. (2021). Intrapartum fetal heart rate patterns and perinatal outcome in chorioamnionitis at or beyond 34 weeks of gestation. Journal of Obstetrics and Gynaecology Research, 47(3), 1110-1117. | Aim / does not address our research question; no neonatal outcome of interest |
| J. R. Murphy, A. D. Haverkamp, S. Langendoerfer and M. Orleans (1981). The relation of electronic fetal monitoring patterns to infant outcome measures in a random sample of term size infants born to high risk mothers. AM J EPIDEMIOL 1981 Vol. 114 Issue 4 Pages 539-547 | Aim / does not address our research question; no neonatal outcome of interest |
| Neilson, J. P. (2015). Fetal electrocardiogram (ECG) for fetal monitoring during labour. Cochrane database of systematic reviews, (12). | Article type; review |
| Nelson, K. B., Bingham, P., Edwards, E. M., Horbar, J. D., Kenny, M. J., Inder, T., ... & Soll, R. F. (2012). Antecedents of neonatal encephalopathy in the vermont oxford network encephalopathy registry. Pediatrics, 130(5), 878-886. | Aim / does not address our research question; no neonatal outcome of interest |
| Nisenblat, V., Alon, E., Barak, S., Gonen, R., Bader, D., & Ohel, G. (2006). Fetal heart rate patterns and neurodevelopmental outcome in very low birth weight infants. Acta obstetricia et gynecologica Scandinavica, 85(7), 792-796. | Aim / does not address our research question; no neonatal outcome of interest |
| Norén, H., Amer-Wåhlin, I., Hagberg, H., Herbst, A., Kjellmer, I., Marşál, K., ... & Rosén, K. G. (2003). Fetal electrocardiography in labor and neonatal outcome: data from the Swedish randomized controlled trial on intrapartum fetal monitoring. American journal of obstetrics and gynecology, 188(1), 183-192. | Aim / does not address our research question; ctg vs. ctg+st |
| Nozar, M., Fiol, V., Martinez, A., Enrique Pons, J., Alonso, J., & Briozzo, L. (2008). Importance of electronic monitoring of intrapartum fetal heart rate as a predictor of neonatal outcomes. REVISTA MEDICA DEL URUGUAY, 24(2), 94-101. | Aim / does not address our research question; no neonatal outcome of interest |
| Ogunyemi, D., Jovanovski, A., Friedman, P., Sweatman, B., & Madan, I. (2019). Temporal and quantitative associations of electronic fetal heart rate monitoring patterns and neonatal outcomes. The Journal of Maternal-Fetal & Neonatal Medicine, 32(18), 3115-3124. | Aim / does not address our research question; no neonatal outcome of interest |
| Ohira, S., Yamanaka, S., Asaka, R., Ando, H., Fuseya, C., Kikuchi, N., ... & Shiozawa, T. (2019). Sawtooth fetal heart rate pattern associated with a favorable neurological outcome in an infant: a case report. Journal of Medical Case Reports, 13(1), 1-3. | Article type; case report |
| Padhye, N. S., Verklan, M. T., Brazdeikis, A., Williams, A. L., Khattak, A. Z., & Lasky, R. E. (2008, August). A comparison of fetal and neonatal heart rate variability at similar post-menstrual ages. In 2008 30th Annual International Conference of the IEEE Engineering in Medicine and Biology Society (pp. 2801-2804). IEEE. | Aim / does not address our research question; fetus and neonate are not linked |
| Painter, M. J. (1989). Fetal heart rate patterns, perinatal asphyxia, and brain injury. Pediatric Neurology, 5(3), 137-144. | Article type; review |
| Painter, M. J., Depp, R., & O'Donoghue, P. D. (1978). Fetal heart rate patterns and development in the first year of life. American Journal of Obstetrics and Gynecology, 132(3), 271-277. | Aim / does not address our research question; no neonatal outcome of interest |
| Pels, A., van Charante, N. M., Heidweiller-Schreurs, C. V., Limpens, J., Wolf, H., de Boer, M. A., & Ganzevoort, W. (2019). The prognostic accuracy of short term variation of fetal heart rate in early-onset fetal growth restriction: A systematic review. European Journal of Obstetrics & Gynecology and Reproductive Biology, 234, 179-184. | Article type; review |
| Perlman, J. M., & Risser, R. (1996). Can asphyxiated infants at risk for neonatal seizures be rapidly identified by current high-risk markers?. Pediatrics, 97(4), 456-462. | Aim / does not address our research question; cases seizure n = 5 |
| Picchio, F. M., Prandstraller, D., Bronzetti, G., & Cervi, E. (2012). Follow-up of neonates with foetal and neonatal arrhythmias. The Journal of Maternal-fetal & Neonatal Medicine: the Official Journal of the European Association of Perinatal Medicine, the Federation of Asia and Oceania Perinatal Societies, the International Society of Perinatal Obstetricians, 25, 53-53. | Article type; follow up |
| Pratama, R., & Ferraris, M. C. (2019). Correlation of prolonged fetal heart rate decelerations and perinatal outcome among patients undergoing emergency cesarean section: Implication to standardizing management and notification guidelines. European Journal of Obstetrics and Gynecology and Reproductive Biology, 234, e3. | Article type; poster session |
| Pruksanusak, N., Duangchan, R., & Suwanrath, C. (2018). Factors Associated with Adverse Neonatal Outcomes in Category II Intrapartum Fetal Heart Rate Tracings. Journal of the Medical Association of Thailand, 101(7). | Aim / does not address our research question; no neonatal outcome of interest |
| Qureshey, E. J., Mendez-Figueroa, H., Wiley, R. L., Bhalwal, A. B., & Chauhan, S. P. (2022). Cesarean delivery at term for non-reassuring fetal heart rate tracing: risk factors and predictability. The Journal of Maternal-Fetal & Neonatal Medicine, 35(25), 6714-6720. | Aim / does not address our research question; no neonatal outcome of interest |

Continues

**Table S1. Continued**

| **Author names, year of publication, title, journal** | **Reason for exclusion** |
| --- | --- |
| Rahman, H., Renjhen, P., Dutta, S., & Kar, S. (2012). Admission cardiotocography: Its role in predicting foetal outcome in high-risk obstetric patients. The Australasian medical journal, 5(10), 522. | Aim / does not address our research question; no neonatal outcome of interest |
| Ravichandran, L., Allen, V. M., Allen, A. C., Vincer, M., Baskett, T. F., & Woolcott, C. G. (2020). Incidence, intrapartum risk factors, and prognosis of neonatal hypoxic-ischemic encephalopathy among infants born at 35 weeks gestation or more. Journal of Obstetrics and Gynaecology Canada, 42(12), 1489-1497. | Aim / does not address our research question; no statistical analysis |
| RIMSZA, R. R., FROLOVA, A. I., KELLY, J. C., CARTER, E. B., CAHILL, A. G., & RAGHURAMAN, N. (2023). Intrapartum electronic fetal monitoring features associated with a clinical diagnosis of non-reassuring fetal status. American Journal of Obstetrics & Gynecology MFM, 101068. | Aim / does not address our research question; no neonatal outcome of interest |
| Rosen, M. G., & Dickinson, J. C. (1993). The paradox of electronic fetal monitoring: more data may not enable us to predict or prevent infant neurologic morbidity. American Journal of Obstetrics and Gynecology, 168(3), 745-751. | Article type; clinical opinion |
| Scher, M. S., Steppe, D. A., & Beggarly, M. (2008). Timing of neonatal seizures and intrapartum obstetrical factors. Journal of child neurology, 23(6), 640-643. | Aim / does not address our research question; no neonatal outcome of interest |
| Schifrin, B. S. (2010). Graded classification of fetal heart rate tracings: association with neonatal metabolic acidosis and neurologic morbidity. American Journal of Obstetrics & Gynecology, 202(5), e11. | Article type; comment paper |
| B. S. Schifrin, G. Foye and J. Amato (1979). Routine fetal heart rate monitoring in the antepartum period. Obstetrics & Gynecology, 54(1), 21-25. | Aim / does not address our research question; no neonatal outcome of interest |
| Shields, J. R., & Schifrin, B. S. (1988). Perinatal antecedents of cerebral palsy. Obstetrics and Gynecology, 71(6 Pt 1), 899-905. | Aim / does not address our research question; no neonatal outcome of interest |
| Shields, L. E., Wiesner, S., Klein, C., Pelletreau, B., & Hedriana, H. L. (2018). A standardized approach for category II fetal heart rate with significant decelerations: maternal and neonatal outcomes. American Journal of Perinatology, 35(14), 1405-1410. | Aim / does not address our research question; pre and post standardization |
| Shrestha, M., Shrestha, L., & Shrestha, P. S. (2009). Profile of Asphyxiated Babies at Tribhuvan University Teaching Hospital. | Aim / does not address our research question; no neonatal outcome of interest |
| Shrestha, S., & Shrestha, I. (2019). Admission Cardiotocography in Predicting Perinatal Outcome. Kathmandu Univ Med J (KUMJ), 17(67), 201-205. | Aim / does not address our research question; sepsis n =1 |
| Shy, K. K., Luthy, D. A., Bennett, F. C., Whitfield, M., Larson, E. B., Van Belle, G., ... & Stenchever, M. A. (1990). Effects of electronic fetal-heart-rate monitoring, as compared with periodic auscultation, on the neurologic development of premature infants. New England Journal of Medicine, 322(9), 588-593. | Aim / does not address our research question; auscultation vs EFM |
| Singh, S. K., Kumar, R., Agarwal, A., Tyagi, A., & Bisht, S. S. (2022). Intrapartum cardiotocographic monitoring and its correlation with neonatal outcome. Journal of Family Medicine and Primary Care, 11(11), 7398. | Aim / does not address our research question; seizure cases n = 4 |
| Small, K. A., Sidebotham, M., Fenwick, J., & Gamble, J. (2020). Intrapartum cardiotocograph monitoring and perinatal outcomes for women at risk: Literature review. Women and Birth, 33(5), 411-418. | Article type; review |
| Spencer, J. A., Badawi, N., Burton, P., Keogh, J., Pemberton, P., & Stanley, F. (1997). The intrapartum CTG prior to neonatal encephalopathy at term: a case‐control study. BJOG: An International Journal of Obstetrics & Gynaecology, 104(1), 25-28. | Aim / does not address our research question; no neonatal outcome of interest |
| Steer, P. J. (2018). Continuous electronic fetal heart rate monitoring in labour is a screening test, not a diagnostic test. BJOG: An International Journal of Obstetrics & Gynaecology, 125(11), 1488-1488. | Article type; comment paper |
| Su, L. L., Chong, Y. S., & Biswas, A. (2007). Use of fetal electrocardiogram for intrapartum monitoring. ANNALS-ACADEMY OF MEDICINE SINGAPORE, 36(6), 416. | Article type; review |
| Takano, Y., Furukawa, S., Ohashi, M., Michikata, K., Sameshima, H., & Ikenoue, T. (2013). Fetal heart rate patterns related to neonatal brain damage and neonatal death in placental abruption. Journal of Obstetrics and Gynaecology Research, 39(1), 61-66. | Aim / does not address our research question; no neonatal outcome of interest |
| Tarvonen, M., Hovi, P., Sainio, S., Vuorela, P., Andersson, S., & Teramo, K. (2021). Intrapartal cardiotocographic patterns and hypoxia-related perinatal outcomes in pregnancies complicated by gestational diabetes mellitus. Acta Diabetologica, 58, 1563-1573. | Aim / does not address our research question; GDM vs. no-GDM |
| Tarvonen, M., Hovi, P., Sainio, S., Vuorela, P., Andersson, S., & Teramo, K. (2021). Intrapartum zigzag pattern of fetal heart rate is an early sign of fetal hypoxia: a large obstetric retrospective cohort study. Acta Obstetricia et Gynecologica Scandinavica, 100(2), 252-262. | Aim / does not address our research question; HIE n=2 |
| Tarvonen, M., Sainio, S., Hiilesmaa, V., Andersson, S., & Teramo, K. (2020, March). Intrapartum Fetal Heart Rate Patterns and Neonatal Outcome in a Large Obstetric Cohort. In reproductive science (Vol. 27, No. SUPPL 1, pp. 153A-153A). | Article type; scientific abstract |
| Thomas, P. W., Haslum, M. N., MacGillivray, I., & Golding, M. J. (1989). Does fetal heart rate predict subsequent heart rate in childhood?. Early human development, 19(2), 147-152. | Aim / does not address our research question; no neonatal outcome of interest |
| Tita, A. (2016). 711: Late intrapartum FHR patterns and their relationship to neonatal outcomes in nulliparas. American Journal of Obstetrics & Gynecology, 214(1), S373-S374. | Article type; poster session |
| Continues | |

**Table S1. Continued**

| **Author names, year of publication, title, journal** | **Reason for exclusion** |
| --- | --- |
| Van Kordelaar, L. S., Nijdam, W., & Eskes, T. K. A. B. (1999). Extrasystoles in the fetal CTG during labour might be a first sign of fetal-neonatal sepsis. Fetal diagnosis and therapy, 14(5), 262-263. | Article type; case report |
| Vandenbroucke, L., Doyen, M., Le Lous, M., Beuchée, A., Loget, P., Carrault, G., & Pladys, P. (2017). Chorioamnionitis following preterm premature rupture of membranes and fetal heart rate variability. Plos one, 12(9), e0184924. | Aim / does not address our research question; no neonatal outcome of interest |
| Vanitha, C. H. (2022). CLINICAL STUDY ON FETAL HEART RATE MONITORING IN DETECTING FETAL DISTRESS IN PREGNANT WOMEN IN LABOR. European Journal of Molecular & Clinical Medicine, 9(6), 157-168. | Aim / does not address our research question; HIE n=2 |
| Visser, G. H. A. (1988). 8 Abnormal antepartum fetal heart rate patterns and subsequent handicap. Baillière's Clinical Obstetrics and Gynaecology, 2(1), 117-124. | Article type; review |
| Weiner, E., Bar, J., Fainstein, N., Schreiber, L., Ben-Haroush, A., & Kovo, M. (2015). Intraoperative findings, placental assessment and neonatal outcome in emergent cesarean deliveries for non-reassuring fetal heart rate. European Journal of Obstetrics & Gynecology and Reproductive Biology, 185, 103-107. | Aim / does not address our research question; intraoperative findings vs. no intraoperative finding as predictor |
| Weiner, E., Fainstein, N., Pomeranz, A., Schreiber, L., Bar, J., & Kovo, M. (2016). Pregnancy outcome and placental pathology in emergent cesarean deliveries for non-reassuring fetal heart rate in laboring versus non-laboring women. The Journal of Maternal-Fetal & Neonatal Medicine, 29(19), 3089-3093. | Aim / does not address our research question; labor vs. no labor as predictor |
| Wendel, H., & Wiklund, D. E. (1971). Fetal and neonatal ECG. Studies during labour and after delivery. Acta obstetricia et gynecologica Scandinavica. Supplement, 9, 64. | Aim / does not address our research question; no ctg |
| Wendel, P. J., Cox, S. M., Roberts, S. W., Dax, J., & Gilstrap, L. C. (1994). Chorioamnionitis: association of nonreassuring fetal heart-rate patterns and interval from diagnosis to delivery on neonatal outcome. Infectious diseases in obstetrics and gynecology, 2, 162-166. | Aim / does not address our research question; no fhr vs sepsis |
| West, C. R., Curr, L., Battin, M. R., Harding, J. E., McCowan, L. M., Belgrave, S., ... & Westgate, J. A. (2005). Antenatal antecedents of moderate or severe neonatal encephalopathy in term infants–a regional review. Australian and New Zealand journal of obstetrics and gynaecology, 45(3), 207-210. | Aim / does not address our research question; no neonatal outcome of interest |
| Westgate, J. A., Gunn, A. J., & Gunn, T. R. (1999). Antecedents of neonatal encephalopathy with fetal acidaemia at term. BJOG: An International Journal of Obstetrics & Gynaecology, 106(8), 774-782. | Aim / does not address our research question; no statistical analysis |
| M. Westgren, P. Hormquist, I. Ingemarsson and N. Svenningsen. (1984). Intrapartum fetal acidosis in preterm infants: fetal monitoring and long-term morbidity. Obstetrics and Gynecology, 63(3), 355-359. | Aim / does not address our research question; no neonatal outcome of interest |
| Winbo, A., Fosdal, I., Lindh, M., Diamant, U. B., Persson, J., Wettrell, G., & Rydberg, A. (2015). Third trimester fetal heart rate predicts phenotype and mutation burden in the type 1 long QT syndrome. Circulation: Arrhythmia and Electrophysiology, 8(4), 806-814. | Aim / does not address our research question; no neonatal outcome of interest |
| Wolf, H., Arabin, B., Lees, C. C., Oepkes, D., Prefumo, F., Thilaganathan, B., ... & Zimmermann, A. (2017). Longitudinal study of computerized cardiotocography in early fetal growth restriction. Ultrasound in Obstetrics & Gynecology, 50(1), 71-78. | Aim / does not address our research question; no neonatal outcome of interest |
| Wolf, H., Gordijn, S. J., Onland, W., Vliegenthart, R. J. S., & Ganzevoort, J. W. (2020). Computerized fetal heart rate analysis in early preterm fetal growth restriction. Ultrasound in Obstetrics & Gynecology, 56(1), 51-60. | Aim / does not address our research question; no neonatal outcome of interest |
| Wolfberg, A. J., & Norwitz, E. R. (2009). Probing the fetal cardiac signal for antecedents of brain injury. Clinics in perinatology, 36(3), 673-684. | Article type; cases |
| Yatham, S. S., Whelehan, V., Archer, A., & Chandraharan, E. (2020). Types of intrapartum hypoxia on the cardiotocograph (CTG): do they have any relationship with the type of brain injury in the MRI scan in term babies?. Journal of Obstetrics and Gynaecology, 40(5), 688-693. | Aim / does not address our research question; no neonatal outcome of interest |
| Youchah, J., Chazotte, C., & Cohen, W. R. (1989). Heart rate patterns and fetal sepsis. American journal of perinatology, 6(03), 356-359. | Aim / does not address our research question; no statistical analysis |
| M. Zilianti, C. L. Segura and F. Cabello (1973). Studies on fetal bradycardia during birth process: I. Obstetrics & Gynecology, 42(6), 831-839. | Aim / does not address our research question; no statistical analyis |
| Zuarez-Easton, S., Hosary, S., Zafran, N., Garmi, G., Felszer, C., & Salim, R. (2018). Peripartum events associated with severe neurologic morbidity and mortality among acidemic neonates. Archives of Gynecology and Obstetrics, 297, 877-883. | Aim / does not address our research question; no neonatal outcome of interest |

**Table S2. The Newcastle-Ottawa Scale score per category.**

| **First author (year)** | **Selection** | **Comparability** | **Exposure** | **Total stars** |
| --- | --- | --- | --- | --- |
| Barrois (2019) | 3 | 0 | 3 | 6 |
| Buhimschi (2008) | 4 | 1 | 3 | 8 |
| Bustos (1975) | 3 | 0 | 3 | 6 |
| Casey (1975) | 4 | 0 | 3 | 7 |
| Day (1992) | 3 | 2 | 2 | 7 |
| Di Pasquo (2022) | 4 | 0 | 2 | 6 |
| Elliot (2010) | 4 | 0 | 3 | 7 |
| Eventov-Friedman (2012) | 4 | 0 | 3 | 7 |
| Geva (2023) | 3 | 2 | 3 | 8 |
| Glantz (2011) | 1 | 2 | 3 | 9 |
| Gonen(1991) | 3 | 2 | 3 | 8 |
| Graham (2014) | 3 | 2 | 3 | 8 |
| Hameed (1986) | 4 | 0 | 3 | 7 |
| Hannaford (2016) | 3 | 0 | 2 | 5 |
| Hayes (2013) | 3 | 0 | 2 | 5 |
| Herbst (1997) | 3 | 2 | 3 | 8 |
| Keegan (1985) | 3 | 2 | 2 | 7 |
| Kumari (2022) | 3 | 0 | 2 | 5 |
| Larma (2007) | 3 | 2 | 3 | 8 |
| Locatelli (2010) | 3 | 0 | 2 | 5 |
| Martinez-biarge (2013) | 3 | 0 | 3 | 6 |
| Mendez-Figueroa (2015) | 4 | 2 | 3 | 9 |
| Mendez-Figueroa (2022) | 4 | 2 | 3 | 9 |
| Michaeli (2021) | 3 | 2 | 2 | 7 |
| Milsom (2002) | 3 | 2 | 2 | 7 |
| Minchom (1987) | 3 | 1 | 3 | 7 |
| Munyaw(2023) | 4 | 0 | 3 | 7 |
| Murray (2009) | 4 | 0 | 3 | 7 |
| Oliveira (2019) | 4 | 2 | 3 | 9 |
| Polnaszek (2020) | 4 | 2 | 3 | 9 |
| Rayburn (1987) | 3 | 2 | 3 | 8 |
| Reynolds (2022) | 3 | 0 | 2 | 5 |
| Schiano (1984) | 2 | 0 | 3 | 5 |
| Sheen (2014) | 4 | 0 | 3 | 7 |
| Soncini (2014) | 4 | 0 | 3 | 7 |
| Strauss (1985) | 3 | 2 | 3 | 7 |
| Tejani (1984) | 4 | 0 | 3 | 7 |
| Torbenson (2017) | 3 | 2 | 2 | 7 |
| Vargas-Calixto (2021) | 4 | 0 | 3 | 7 |
| Vintzileos (1986) | 4 | 0 | 3 | 7 |
| Vlastos (2007) | 4 | 0 | 3 | 7 |
| Williams (2004) | 3 | 2 | 3 | 8 |
