# Supplementary material for: A systematic catalog of studies on fetal heart rate pattern and neonatal outcome variables
Source: publisher site journal article supplement (doi:10.1515/jpm-2024-0364), 2024-10-24
Supplement: Supplementary file 3 [file j_jpm-2024-0364_suppl_003.docx]

| **Table S3. Study characteristics: Neonatal heart rate.** | | | | | | | |
| --- | --- | --- | --- | --- | --- | --- | --- |
| **First author (year)** | **Included participants** | **Fetal heart rate** | | | **Neonatal heart rate** | | | **Results** |
| **Time of assessment** | **Metrics** | **Guideline for classification**  **# Assessor(s)** | **Time of assessment** | **Metrics** | **Guideline for assessment** |
| Bustos (1975) | n=23 | Intrapartum: from 90 minutes before delivery | Time domain  Parameters   - Baseline | Caldeyro-Barcia et al. (1966)[1]  Assessor is not specified | First 90 minutes of life, 30 seconds epochs | Time domain   - Heart rate | Definition is given | The average heart rate at 10 minutes of life is significantly higher than the baseline heart rate 30 minutes before delivery (p<0.05).  The higher the baseline heart rate 30 minutes before birth, the lower the increment of the neonatal heart rate 10 minutes after birth (p<0.001). |
| Sheen  (2014) | Cesarean delivery for:   - Abnormal fetal heart rate: n=22 - Dystocia: n=29 - Elective purposes: n=32 | Intrapartum | Time domain  Classification   - nonreassuring | NICHD (2008)[2]  Assessor is not specified | Third day of life, at least for 5 minutes | Time domain   - SDANN   Frequency domain   - Low frequency - High frequency - Total power - Low frequency % - High frequency % | - Task Force of the European Society of Cardiology (1996)[3] - Chatow et al. (1995)[4] - Smith et al. (2004)[5] | Nonreassuring fetal heart rate patterns were associated with lower heart rate variability postnatal for SDANN (p<0.05), HF (p<0.05), HF% (p<0.05), and TP (p<0.05) in neonates delivered through cesarean section.  Nonreassuring fetal heart rate pattern group had significantly lower SDANN(p<0.05), HF(p<0.05), and TP(p<0.05) than those of the elective group, and significantly lower HF(p<0.05), HF%(p<0.05), and TP (p<0.05) than those of the dystocia group. |
| Oliveira (2019) | n=150 | Not specified | General   - Not done - Unknown - Other   Time domain  Parameters   - Normal - Late deceleration - Bradycardia - Tachycardia - Variable deceleration | Guideline is not specified  Assessor is not specified | First day of life, 5 minute epochs | Time domain   - Heart rate - SDNN - RMSSD - SDSD - pNN20 - pNN50   Frequency domain   - HFn - LFn - Total power   Geometric/ nonlinear   - SD1,SD2 - CVI - CSI - TINN - HRV Index - Parseval Index | - Adaptation of: Task Force of the European Society of Cardiology (1996) [3] - Schwartz et al. (2002)[6] - Laborde et al. (2017)[7] - Doyle et al. (2009)[8] - Goulding et al. (2015)[9] - Temko et al. (2015)[10] | A significant association was found between abnormal CTG findings and neonatal heart rate variability trends over time for CSI (p=0.03), LFn (p=0.01) and HFn (p=0.02).  For the six hourly heart rate variability averages the bradycardia group differed significantly from the normal, variable deceleration and other groups in CSI (p=0.02, p=0.03, p =0.04)  HFn was only different between bradycardia and variable deceleration groups (p=0.03) and LFn did not differ between the CTG groups. |
| Continues | | | | | | | | |

| **Table S3. Continued** | | | | | | | |
| --- | --- | --- | --- | --- | --- | --- | --- |
| **First author (year)** | **Included participants** | **Fetal heart rate** | | | **Neonatal heart rate** | | | **Results** |
| **Time of assessment** | **Metrics** | **Guideline for classification**  **# Assessor(s)** | **Time of assessment** | **Metrics** | **Guideline for assessment** |
| Munyaw  (2023)[11] | n=305 | Intrapartum: second stage of labor, one hour before delivery every 15 seconds | Time domain  Parameters   - 25th percentile heart rate - Median percentile heart rate - 75th percentile heart rate | Definition is given  Software analysis | Birth, first hour after birth, every 15 seconds | Time domain  Parameters   - 25th percentile heart rate - Median heart rate   75th percentile heart rate | Definition is given | A significant change in median heart rate was found from immediately before delivery (132) until 1 min after delivery (168) (p < 0.05).  A slight decrease in median fetal heart rate was observed in the last 60 min before delivery (from 136 to 131) (p = 0.4844).  There was a significant drop in neonatal heart rate from 1 min (168) to 10 min (153) after delivery (p < 0.05) and from 1min (168) to 60 min (136) after delivery (p < 0.05). |
| Abbreviations: CSI, cardiac sympathetic index; CTG, cardiotocography; CVI, cardiac vagal index; HF, high frequency; HFn, normalized high frequency; HRV index, heart rate variability index; LF, low frequency; LFn, normalized low frequency; min, minute; NICHD, National Institute of Child Health and Human Development; pNNx, proportion of NN intervals that differ from the previous interval by at least x milliseconds; RMSSD, Root mean square of the consecutive RR differences; SDANN, standard deviation of average NN intervals; SDNN, Standard deviation of the consecutive RR intervals; SDSD, Standard deviation of consecutive RR differences; SD1, Standard deviation of the Poincaré cross-wise; SD2, Standard deviation of the Poincaré lengthwise; TINN, Triangular Index of the NN intervals; TP, total power. | | | | | | | | |

| **Table S4 Study characteristics: Necrotizing enterocolitis** | | | | | | |
| --- | --- | --- | --- | --- | --- | --- |
| **First author (year)** | **Included participants** | **Fetal heart rate** | | | **Neonatal necrotizing enterocolitis** | | **Results** |
| **Time of assessment** | **Metrics** | **Guideline for classification**  **# Assessor(s)** | **Time of assessment** | **Definition** |
| Glantz (2011) | n=488  (incl. 49 cases with NEC) | Antepartum: within the week before delivery | Time domain  Parameters   - Decelerations   Classification   - Non-reactive - Reactive (10-beat) - Reactive (15-beat) | - ACOG (2010)[12] - NICHD (2008)[2]   One assessor | Not specified | Not specified | There were no statistically significant unadjusted associations between degree of reactivity and necrotizing enterocolitis, and between presence of decelerations and necrotizing enterocolitis. |
| Mendez-Figueroa (2015) | Cesarean delivery for:   - Nonreassuring fetal heart rate: n=177 (incl. 5 cases with NEC) - Other reason: n=1,114 (incl. 45 cases with NEC) | Intrapartum | Time domain  Classification   - Nonreassuring | Guideline is not specified  One assessor | Not specified | Grade II or Grade III   - Not specified | The rate of necrotizing enterocolitis grade 2 or 3 was not significantly different in children born through cesarean delivery for nonreassuring fetal heart rate (2.8% vs 4.1%; p=.32; aRR: 0.6(0.3 – 1.6)) |
| Mendez-Figueroa (2022) | Cesarean delivery for:   - Nonreassuring fetal heart rate: n=1,220 (incl. 15 cases with NEC) - Other reason: n=15,459 (incl. 139 cases with NEC) | Intrapartum | Time domain  Classification   - Nonreassuring | Guideline is not specified  Assessor is not specified | Not specified | Not specified | Necrotizing enterocolitis did not occur significantly more frequently in newborns who delivered subsequent to cesarean delivery for nonreassuring fetal heart rate tracing versus those that did not (1.2% vs 0.9%; p>0.05; aRR: 1.51(0.89 – 2.58)) |
| Abbreviations: ACOG, American College of Obstetricians and Gynecologists; aRR, adjusted risk ratio; incl, including; NICHD, National Institute of Child Health and Human Development; NEC, necrotizing enterocolitis. | | | | | | | |

| **Table S5. Study characteristics: Neonatal infection** | | | | | | |
| --- | --- | --- | --- | --- | --- | --- |
| **First author (year)** | **Included participants** | **Fetal heart rate** | | | **Neonatal infection** | | **Results** |
| **Time of assessment** | **Metrics** | **Guideline for classification**  **# Assessor(s)** | **Time of assessment** | **Definition** |
| Schiano (1984) | - Persistent fetal tachycardia n=40 (incl. 10 cases with neonatal infection) - Normal fetal heart rate: n=167 (incl. 1 case with neonatal infection) | Intrapartum: last 10 minutes of the second stage of labor | Time domain  Parameters   - Tachycardia (mild, marked) | ACOG (1975)[13]  Assessor is not specified | Not specified | Neonatal infection (pneumonia-sepsis):   - Chest roentgenogram infiltrate - Leukocytosis > 20,000/mm2 - Temperature ≥ 101 F - Positive cultures (blood/gastric aspirates/spinal fluid) | When infants with tachycardia during the last 10 minutes of labor were compared to those with a normal baseline fetal heart rate and variability, the incidence of pneumonia/sepsis was significantly increased (10/40 versus 1/167; p<0.0001). |
| Vintzileos (1986) | n=121  (incl. 26 cases with (suspected) neonatal sepsis) | Within 48 hours of delivery | Time domain  Classification   - Reactive - nonreactive | Biophysical profile scoring of Manning et al. (1981)[14]  Assessor is not specified | On admission to neonatal intensive care unit | Neonatal sepsis:   - Positive culture (blood, urine, cerebrospinal fluid)   Possible neonatal sepsis (two or more of the following criteria):   - White blood cell count <5000/mm3 <1800/mm3 - polymorphonuclear leukocyte count - I:T ratio >0.2, - positive gastric aspirate for poly- morphonuclear leukocytes showing >5 per high-power field. | Sensitivity for (possible) neonatal sepsis is 84.6% (22/26). Specificity for (possible) neonatal sepsis is 86.3% (82/95). Positive predictive value is 62.9% (22/35). Negative predictive value is 95.3% (82/86). |
| Gonen (1991) | - Cases with congenital sepsis: n=13 - Controls: n=13 | Within 24 hours of delivery | Time domain  Classification   - Reactive - nonreactive | Definition is given  Assessor is not specified | At birth | Neonatal sepsis:   - Positive blood culture - Clinical symptoms | Eleven of 13 infants with congenital sepsis had a reactive nonstress test within 24 hours of delivery and two had a nonreactive test. Among the controls, there were also 11 reactive and two nonreactive nonstress tests.  The sensitivity and specificity of the nonstress test in predicting congenital sepsis in patients with premature rupture of the membranes were 15.4% and 84.6%, respectively. The positive predictive value and the negative predictive value were both 50%. |
| Continues | | | | | | | |

| **Table S5. Continued** | | | | | | |
| --- | --- | --- | --- | --- | --- | --- |
| **First author (year)** | **Included participants** | **Fetal heart rate** | | | **Neonatal infection** | | **Results** |
| **Time of assessment** | **Metrics** | **Guideline for classification**  **# Assessor(s)** | **Time of assessment** | **Definition** |
| Day (1992) | - Cases with neonatal sepsis (n=18) - Controls (n=18) | Intrapartum: latent phase, active phase, second stage, overall | Time domain  Parameters   - Accelerations - Baseline - Decelerations - Tachycardia - Variability   Classification   - Reassuring - Nonreassuring - Ominous | Haverkamp et al. (1979)[15]  One assessor | Less than 72 hours after birth | Early onset neonatal sepsis:   - Positive blood culture | No statistically significant differences in fetal heart rate tracings interpretation were found between cases and controls for each stage of labor or overall impression.  Similar fetal heart rate tracings from GBS infected children were not significantly different from control children.  Also, baseline fetal heart rate , presence of late or variable decelerations, presence of accelerations, decreased variability, or fetal tachycardia did not differ significantly between cases and controls. |
| Herbst (1997) | - Tachycardia: n=41 (incl. 3 cases with neonatal infection) - Normal heart rate: n=171 (incl. 12 cases with neonatal infection) | Intrapartum: 30 minutes | Time domain  Parameters  Tachycardia | Definition is given  Assessor is not specified | Not specified | Neonatal infection  (pneumonia-sepsis):   - Positive blood culture - Symptoms and X-ray findings of pneumonia and CRP rise to 10 or more - Symptoms suggestion septicaemia and CRP rise to 10 or more, and treatment with antibiotics | Fetal tachycardia preceding maternal fever is not associated with neonatal infection. |
| Buhimschi (2008) | n= 86  (incl. 26 cases with early onset neonatal sepsis) | Antepartum   - time of hospital admission - time of amniocentesis   Intrapartum:  prior to delivery, preferably within 1 hour | Time domain  Parameters   - Baseline   Classification   - reactive - non-reactive - reassuring - non-reassuring | NICHD (1997)[16]  Three assessors | First hour after birth | Early onset neonatal sepsis:   - Hematological indices from blood specimens and cultures | Neonates with early onset sepsis had significantly higher nonreassuring fetal heart rate during time of admission (Fisher’s exact p=0.002, spearman r= 0.365, p<0.001).  No other significant relationships were found between fetal heart rate monitoring patters and early onset neonatal sepsis.  Of all fetal heart rate movement pattern, a non-reassuring test at admission had 32% sensitivity, 95% specificity, 73% positive predictive value, 77% negative predictive value, and 76% accuracy in predicting early onset neonatal sepsis.  The ability of a non-reassuring heart rate movement pattern at admission to predict early onset neonatal sepsis was maintained after correcting for GA (OR: 5.6 (1.2 - 26.2), p =0.03). |
| Continues | | | | | | | |
| **Table S5. Continued** | | | | | | |
| **First author (year)** | **Included participants** | **Fetal heart rate** | | | **Neonatal infection** | | **Results** |
| **Time of assessment** | **Metrics** | **Guideline for classification**  **# Assessor(s)** | **Time of assessment** | **Definition** |
| Mendez-Figueroa (2015) | Cesarean delivery for:   - Nonreassuring fetal heart rate: n=177 (incl. 37 cases with neonatal sepsis) - Other reason: n=1,114 (incl. 161 cases with neonatal sepsis) | Intrapartum | Time domain  Classification  Nonreassuring | Guideline is not specified  One assessor | Not specified | Neonatal sepsis   - Culture-proven | The rate of confirmed sepsis was higher in children born through cesarean delivery for nonreassuring fetal heart rate than those who did not, but did not reach statistically significance (20.9% vs. 14.6%, p=.11). |
| Polnaszek (2019) | - Marked variability in fetal heart rate: n=390 (incl. 34 cases with suspected neonatal sepsis) - No marked variability: n=8,190 (incl. 593 cases with suspected neonatal sepsis) | Intrapartum: 30 minutes to two hours prior to delivery, in 10 minutes epochs | Time domain  Parameters  Variability (marked) | NICHD (2008)[2]  One assessor | Not specified | Suspected neonatal sepsis   - Not specified | Neonates with marked variability in fetal heart rate patterns had no increased risk for suspected sepsis (8.7% vs. 7.2%). |
| Mendez-Figueroa (2022) | Cesarean delivery for:   - Nonreassuring fetal heart rate: n=1,220 (incl. 200 cases with neonatal sepsis) - Other reason: n=15,459 (incl. 1,536 cases with neonatal sepsis) | Intrapartum | Time domain  Classification   - Nonreassuring | Guideline is not specified  Assessor is not specified | Not specified | Neonatal sepsis   - Not specified | Neonatal sepsis occurred more frequently in newborns who delivered subsequent to cesarean delivery for nonreassuring fetal heart rate tracing versus those that did not (16.4% vs 9.9%; aRR 1.58(1.38 - 1.82), p<0.05). |
| Abbreviations: ACOG, American College of Obstetricians and Gynecologists; aRR, adjusted risk ratio; CRP, C-reactive protein; incl, including; GBS, group B Streptococcus; NICHD, National Institute of Child Health and Human Development; OR, odd ratio. | | | | | | | |

| **Table S6. Study characteristics: Neonatal seizure** | | | | | | |
| --- | --- | --- | --- | --- | --- | --- |
| **First author (year)** | **Included participants** | **Fetal heart rate** | | | **Neonatal seizure** | | **Results** |
| **Time of assessment** | **Metrics** | **Guideline**  **# Assessor(s)** | **Time of assessment** | **Definition** |
| Keegan (1985) | - Cases with seizure activity preterm: n=32, or term: n=34 - Controls preterm: n=32, or term: n=34 | Intrapartum | Time domain  Parameters   - Variability   Classification   - Abnormal | Hon and Quilligan (1967)[17]  Two assessors | Not specified | Not specified | A significant increased incidence of abnormal fetal heart rate patterns was noted in the seizure groups when compared to the control groups (preterm: p<0.0001, term: p<0.05).  Absent variability occurred significantly more in the preterm seizure group compared to the control group (p<<0.0001).  The combination of abnormal pattern and absent variability was statistically more common in the preterm seizure group compared to the control group (p<0.0001). The term group showed the same trend, but did was not significant.  Loss of variability was more common in the seizure distress and abnormal group than in the total control group (p<0.0001).  The percentage of labor that was abnormal was increased in the seizure, distress subgroup when compared with any other subgroup. |
| Minchom (1987) | - Cases with seizure activity: n=30 - Controls n=73 | Intrapartum | Time domain  Classification   - Abnormal | Definition is given  One assessor | Within the first 48 hours of life | Not specified | In seven of the 30 term seizure group delivery had been preceded by prolonged abnormalities of the fetal heart rate pattern consistent with fetal distress. No such abnormalities were found in the controls (OR: 47 (7.2-206.2). |
| Williams (2004) | - Cases with seizures secondary to hypoxic-ischemic encephalopathy: n=25 - Controls: n=25 | Intrapartum: last hour prior to delivery | Time domain  Parameters   - Bradycardia - Decelerations (variable, late) - Variability - Accelerations - Baseline   Classification   - Abnormal | NICHD (1997)[16]  One assessor | Within the first 24 to 48 hours of life | Seizure activity   - Electro-encephalo-graphic assessment - Magnetic resonance imaging | The odds ratio for bradycardia, variable decelerations, late decelerations and accelerations were decreased in the seizure group compared to the non-seizure group, but did not reach statistical significance.  The odds ratio for minimal/absent variability was increased in the seizure group compared to the non-seizure group, but this was not statistically significant  The seizure group had a statistically significant longer duration of abnormal fetal heart rate compared to the non-seizure group (p<0.001) |
| Mendez-Figueroa (2015) | Cesarean delivery for   - Nonreassuring fetal heart rate: n=177 (incl. 37 cases with seizures) - Other reason: n=1,114 (incl. 161 cases with seizures) | Intrapartum | Time domain  Classification   - Non-reassuring | Definition at discretion of treating physician | Not specified | Not specified | The rate of definite seizure was not significantly different in children born through cesarean delivery for nonreassuring fetal heart rate. |
| Continues | | | | | | | |
| **Table S6. Continued** | | | | | | |
| **First author (year)** | **Included participants** | **Fetal heart rate** | | | **Neonatal seizure** | | **Results** |
| **Time of assessment** | **Metrics** | **Guideline**  **# Assessor(s)** | **Time of assessment** | **Definition** |
| di Pasquo (2022) | n=431  (incl. 14 cases with neonatal seizures) | Intrapartum, from labor onset till delivery | Time domain    Classification hypoxia   - Acute - Subacute - Gradually evolving - Chronic (antepartum) | Physiological CTG interpretation (2018)[18]  Three assessors | Within 7 days of delivery | Not specified | the incidence of neonatal seizures in fetuses with chronic (antepartum) hypoxia was higher than the cases of intrapartum hypoxia (29.4 vs. 2.2%; p<0.001), and were also more common in neonates with subacute hypoxia than in those who suffered gradually evolving hypoxia (4.5 vs. 1.8%; p=0.04). |
| Kumari (2022) | - Normal CTG: n = 132 (incl. 2 cases with neonatal seizures) - Abnormal CTG: n = 118 (incl. 14 cases with neonatal seizures) | Intrapartum | Time domain  Classification   - Normal - Abnormal (pathologic + suspicious) | NICHD (2008)[2]  Not specified | Not specified | Not specified | The incidence of neonatal seizure was significantly lower in the normal CTG group compared to the abnormal (suspicious + pathological) CTG group. (30% vs. 90% , p<0.001). |
| Mendez-Figueroa (2022) | Cesarean delivery for   - Nonreassuring fetal heart rate: n=1,220 (incl. 17 cases with seizures) - Other reason: n=15,459 (incl. 44 cases with seizures) | Intrapartum | Time domain  Classification   - Nonreassuring | Not specified  Not specified | Not specified | Not specified | Neonatal seizure occurred more frequently in newborns who delivered subsequent to cesarean delivery for nonreassuring fetal heart rate tracing versus those that did not (1.4% vs 0.3%; aRR: 4.70 (2.71-8.16), p<0.05). |
| Abbreviations: aRR, adjusted risk ratio; CTG, cardiotocography; incl, including; NICHD, National Institute of Child Health and Human Development; OR, odd ratio; vs, versus. | | | | | | | |

| **Table S7. Study characteristics: Intraventricular hemorrhage** | | | | | | |
| --- | --- | --- | --- | --- | --- | --- |
| **First author (year)** | **Included participants** | **Fetal heart rate** | | | **Intraventricular hemorrhage** | | **Results** |
| **Time of assessment** | **Metrics** | **Guideline for classification**  **# Assessor(s)** | **Time of assessment** | **Definition** |
| Tejani  (1984) | - Periventricular-intraventricular hemorrhage (n=11) - Normal (n=65) | Intrapartum | Time domain  Parameters   - Decelerations   Classification   - Normal - Abnormal | Guideline is not specified  Assessor is not specified | Not specified | Periventricular-intraventricular hemorrhage   - Papile et al. (1978)[19] | There was no correlation between fetal heart rate patterns and sonogram results. |
| Strauss  (1985) | - Cases with intraventricular-subependymal hemorrhage: n=32 - Controls: n=85 | Intrapartum, within four hours prior to delivery | Time domain  Classification   - Reassuring - Suspicious - Ominous | Guideline is not specified  One assessor | As soon as practical after birth | Intraventricular-subependymal hemorrhage   - Papile et al. (1978)[19] | Infants without intraventricular-subependymal hemorrhage were found to demonstrate a statistically higher incidence of reassuring tracings (p<0.05), and a decreased but nonsignificant rate of both suspicious and ominous patterns compared to infants with intraventricular-subependymal hemorrhage.  Ominous fetal heart rate patterns occurred significantly more in monitored infants with severe intraventricular-subependymal hemorrhage (p < 0.01).  Trends toward increasing percentages of nonreassuring (suspicious and ominous) fetal heart rate patterns in those infants with grades 1 and 2 intraventricular-subependymal hemorrhage are noted. |
| Hameed (1986) | - Periventricular-intraventricular hemorrhage: n=18 - Normal: n=58 | Intrapartum: last two hours prior to delivery, 30 minute epochs | Time domain  Classification   - Fischer’s scoring system | Fisher (1976)[20]  Assessor is not specified | Within 24 hours of life | Periventricular-intraventricular hemorrhage   - Papile et al. (1978)[19] | Intrapartum fetal heart rate scores of the normal group, periventricular-intraventricular hemorrhage group did not differ. |
| Rayburn (1987) | - Cases with intraventricular hemorrhage: n=38 - Controls: n=38 | Intrapartum: 20 minute of first stage | Time domain  Classification   - Normal - Suspicious - Ominous | Strauss (1985)[21]  Two assessors | - Within 24 hours of life - On the 7th day of life | Intraventricular hemorrhage   - Papile et al. (1978)[19] | A persistent suspicious or ominous pattern was found in 21 (55%) cases with neonatal intraventricular hemorrhage, but this was not more common than in the control group (20/38, 53%).  A more extensive neonatal hemorrhage causing ventriculomegaly or extending into the parenchyma (grades 3 and 4) was not more common when a suspicious or ominous tracing was found (6/21, 28%) than a normal tracing (6/17, 35%). This finding was true regardless of the apparent duration of the heart rate abnormality.  The most frequent specific abnormal fetal heart rate pattern involved a decreased beat-to-beat variability with mild tachycardia followed by severe variable or late decelerations. This finding in eight fetuses found later to have intraventricular hemorrahage was also not more common than the six cases in the control group. |
| Continues | | | | | | | |
| **Table S7. Continued** | | | | | | |
| **First author (year)** | **Included participants** | **Fetal heart rate** | | | **Intraventricular hemorrhage** | | **Results** |
| **Time of assessment** | **Metrics** | **Guideline for classification**  **# Assessor(s)** | **Time of assessment** | **Definition** |
| Casey  (1997) | - Normal fetal heart rate: n=33 (incl. 8 cases with periventricular-intraventricular hemorrhage) - Abnormal fetal heart rate: n=51 (incl. 14 cases with periventricular-intraventricular hemorrhage) | Intrapartum: last 30 minutes prior to delivery | Time domain  Parameters   - Bradycardia - Decelerations - Tachycardia - Variability   Classification   - Normal - Abnormal | Guideline is not specified  One assessor | - Within 24-48 hours of life | Periventricular-intraventricular hemorrhage   - Perlman et al.(1993)[22] | The incidence of periventricular-intraventricular hemorrhage was unrelated to any of the fetal heart rate patterns.  The incidence of periventricular-intraventricular hemorrhage was significantly not associated with abnormal fetal heart rate patterns in fetuses delivered without labor. |
| Vlastos (2007) | - Cases with periventricular-intraventricular hemorrhage: n=16 - Control: n=81 | Antepartum: one week prior to delivery  Intrapartum: last hour prior to delivery | Time domain  Classification   - Reactive (10-beat) - Reactive (15-beat) | NICHD (1997)[16]  Two assessor | - At third day of life | Periventricular-intraventricular hemorrhage   - Papile et al. (1978)[19] | The presence of severe cerebral lesions was associated with the absence of fetal heart rate accelerations of 10 bpm lasting 10 seconds during a 20-minute interval 1 hour before delivery. This was confirmed using a multivariate analysis (adjusted OR, 4.7; 95% CI, 1.3 to 17.2; p<0.05).  The absence of accelerations of 15 bpm lasting 15 seconds was not associated with severe cerebral lesions.  Fetal heart rate tracing performed 1 week prior to delivery was available for 54 of the neonates, but no significant associations were noted. |
| Glantz (2011) | n = 488  (incl. 225 cases with intraventricular hemorrhage) | Antepartum: within the week before delivery | Time domain  Parameters   - Decelerations   Classification   - Non-reactive - Reactive (10-beat) - Reactive (15-beat) | - ACOG (2010)[12] - NICHD (2008)[2]   One assessor | - Not specified | Intraventricular hemorrhage   - Not specified | There was an unadjusted association between degree of reactivity and intraventricular hemorrhage (p<0.001), and between the presence of decelerations and intraventricular hemorrhage (p<0.03)  10-beat reactivity initially appeared to be associated with worse outcome than was 15-beat reactivity for intraventricular hemorrhage (OR: 1.67 (1.09-2.56) vs. 1.0 (reference)). There was no longer any statistically significant difference when was adjusted for gestational age and birth weight. |
| Continues | | | | | | | |

| **Table S7. Continued** | | | | | | |
| --- | --- | --- | --- | --- | --- | --- |
| **First author (year)** | **Included participants** | **Fetal heart rate** | | | **Intraventricular hemorrhage** | | **Results** |
| **Time of assessment** | **Metrics** | **Guideline for classification**  **# Assessor(s)** | **Time of assessment** | **Definition** |
| Eventov-Friedman (2012) | - No intraventricular hemorrhage or intraventricular hemorrhage I –II: n=78 - Severe intraventricular hemorrhage III-IV: n=18 | In last 24 hours prior to delivery | Time domain  Parameters   - Baseline - Tachycardia - Variability - Decelerations   Classification   - Reactive (10-beat) - Reactive (15-beat) | NICHD (1997)[16]  One assessor | - Within the first 4 days of life | Intraventricular hemorrhage   - Papile et al. (1978)[19] | In comparison with infants with no intraventricular hemorrhage or intraventricular hemorrhage grades I–II, those with severe intraventricular hemorrhage had significantly more absence of reactivity 15X15 on fetal heart rate monitoring before birth (p=0.015).  No other fetal heart rate characteristics were significantly associated with the development of severe intraventricular hemorrhage. |
| Mendez-Figueroa (2015) | Cesarean delivery for   - Nonreassuring fetal heart rate: n=177 (incl. 7 cases with intraventricular hemorrhage III-IV) - Other reason: n=1,114 (incl. 18 cases with intraventricular hemorrhage III-IV) | Intrapartum | Time domain  Parameters  Classification   - Non-reassuring | Guideline is not specified  One assessor | - Not specified | Intraventricular hemorrhage III-IV   - Not specified | The rate of intraventricular hemorrhage grade III or IV was not significantly different in children born through cesarean delivery for nonreassuring fetal heart rate. |
| Hannaford (2016) | - Cases with intraventricular hemorrhage: n=24 - Controls: n=55 | Intrapartum: one hour prior to delivery, 10 minute epochs | Time domain  Parameters   - Tachycardia - Bradycardia - Variability - Decelerations   Classification   - Category I - Category II - Category III | - NICHD (2008)[2] - ACOG (2009)[23]   One assessor | - At day 1-3 of life, - At day 7-10 of life - At 1 month of life | Intraventricular hemorrhage   - Vohr (1996)[24] - Papile et al. (1978)[19] | There was no statistical significant difference in the proportion of category I and category II tracings, tachycardia, bradycardia or decelerations between cases and controls.  The intraventricular hemorrhage group had significantly less moderate variability (p=0.02) and significantly more minimal variability (p=0.02).  The minimal variability had nearly 17% sensitivity, and 100% specificity for the development of intraventricular hemorrhage in the newborn period. This reflects a PPV of 100% and an NPV of approximately 75%. |
| Continues | | | | | | | |

| **Table S7. Continued** | | | | | | |
| --- | --- | --- | --- | --- | --- | --- |
| **First author (year)** | **Included participants** | **Fetal heart rate** | | | **Intraventricular hemorrhage** | | **Results** |
| **Time of assessment** | **Metrics** | **Guideline for classification**  **# Assessor(s)** | **Time of assessment** | **Definition** |
| Mendez-Figueroa (2022) | Cesarean delivery for   - Nonreassuring fetal heart rate: n=1,220 (incl. 11 cases with intraventricular hemorrhage III-IV) - Other reason: n=15,459 (incl. 48 cases with intraventricular hemorrhage III-IV) | Intrapartum | Time domain  Classification   - Nonreassuring | Guideline is not specified  Assessor is not specified | Not specified | Intraventricular hemorrhage III-IV   - Not specified | Intraventricular hemorrhage grade III/IV occurred more frequently in newborns who delivered subsequent to cesarean delivery for nonreassuring fetal heart rate tracing versus those that did not (0.9% vs 0.3%; aRR 2.56(1.32 - 4.94), p<0.05). |
| Abbreviations: ACOG, American College of Obstetricians and Gynecologists; aRR, adjusted risk ratio; bpm, beats per minute; CI, 95% confidence interval; inc, including; NICHD, National Institute of Child Health and Human Development; NPV, negative predictive value; OR, odd ratio; PPV, positive predictive value; vs, versus. | | | | | | | | |

| **Table S8. Study characteristics: Hypoxic-ischemic encephalopathy** | | | | | | |
| --- | --- | --- | --- | --- | --- | --- |
| **First author (year)** | **Included participants** | **Fetal heart rate** | | | **Hypoxic-ischemic encephalopathy** | | **Results** |
| **Time of assessment** | **Metrics** | **Guideline for classification**  **# Assessor(s)** | **Time of assessment** | **Definition** |
| Milsom (2002) | - Cases with asphyxia and hypoxic-ischemic encephalopathy: n=41 - Controls: n=41 | Intrapartum | Time domain  Parameters   - Accelerations - Baseline - Decelerations - Variability   Classification   - CTG scoring system | Käär (1980)[25]  Two assessors | Not specified | Encephalopathy:   - Criteria of Sarnat and Sarnat (1976)[26], modified by Fenichel (1983)[27] | Marked differences were recorded between the hypoxic-ischemic encephalopathy group and the control group regarding all the fetal heart rate parameters.  CTG score was found to be an independent risk factors for hypoxic-ischemic encephalopathy (OR:0.3 (0.2-0.6)). |
| Larma  (2007) | - Cases with neonatal hypoxic-encephalopathy: n=13 - Controls with metabolic acidosis: n=94 | Intrapartum, last hour prior to birth | Time domain  Parameters   - Baseline - Tachycardia - Bradycardia - Accelerations - Decelerations - Variability   Classification   - Reactivity | NICHD (1997)  Three assessors | Not specified | Encephalopathy:   - Sarnat and Sarnat (1976)[26] | The infants with hypoxic-ischemic encephalopathy were found to have statistically significant differences in baseline fetal heart rate, bradycardia, decreased variability, and reactivity.  There was no difference between the hypoxic-ischemic encephalopathy and noninjured infants in total, late, or prolonged decelerations, accelerations and tachycardia  For the identification of hypoxic-ischemic encephalopathy, the sensitivity, specificity, and positive and negative predictive values were 15.4%, 98.9%, 66.7%, and 89.4%, respectively, for bradycardia; 53.8%, 79.8%, 26.9%, and 92.6%, respectively, for decreased variability; 92.3%, 61.7%, 2.7%, and 82.9%, respectively, for non-reactivity; and 7.7%, 98.9%, 50.0%, and 88.6%, respectively, for all 3 abnormalities combined. |
| Murray  (2009) | Cases with hypoxic-ischemic encephalopathy n=35 | Intrapartum: from admission till delivery | Time domain  Parameters   - Bradycardia - Decelerations - Tachycardia - Variability   Classification   - Normal - Suspicious - Pathological | RCOG  Two assessors | At 24 hours | Hypoxic-ischemic encephalopathy:   - Electroencephalography evidence - Sarnat and Sarnat (1976)[26], Pressler et al. (2001)[28] - Clinical evidence (two or more of the following):   - apgar score <5 at 5 minutes   - initial pH <7.1,   - lactate >7 mmol/L   - abnormal neurology   - seizures. | More severe encephalopathy was associated with abnormal CTG on admission or normal admission CTG and acute sentinel events shortly before delivery (p=0.001).  There was no correlation between duration of pathological CTG trace and grade of encephalopathy.  No significant correlation was found between any individual CTG feature and outcome. |
| Continues | | | | | | | |

| **Table S8. Continued** | | | | | | |
| --- | --- | --- | --- | --- | --- | --- |
| **First author (year)** | **Included participants** | **Fetal heart rate** | | | **Hypoxic-ischemic encephalopathy** | | **Results** |
| **Time of assessment** | **Metrics** | **Guideline for classification**  **# Assessor(s)** | **Time of assessment** | **Definition** |
| Elliot  (2010) | - Abnormal group with base deficit > 12mmol/L, hypoxic-ischemic encephalopathy: n=60 - Normal group: n=2,132 - Intermediate group with base deficit > 12mmol/L: n=280 | Intrapartum, last 3 hours prior to delivery | Time domain  Classification   - Green - Blue - Yellow - Orange - Red | - NICHD - Parer et al. (2007)[29]   CALM patterns software | Not specified | Hypoxic-ischemic encephalopathy:   - Umbilical artery base deficit levels > 12 mmol/L - neurological signs of encephalopathy - Criteria of Sarnat and Sarnat (1976)[26], modified by Badawi et al. (1998)[30] | The frequency and duration of electronic fetal monitoring abnormalities considered more severe in the classification method were highest in the hypoxic-ischemic encephalopathy group and lowest in the normal group. |
| Locatelli  (2010) | - Cases with hypoxic-ischemic encephalopathy: n=27 - Controls: n=100 | - Antepartum: at admission - Intrapartum | Time domain  Parameters   - Bradycardia   Classification   - Nonreactive - Suspicious - Ominous | - Fisher et al. (1976)[20] - Boylan (1987)[31]   One assessor | Not specified | Encephalopathy:   - Sarnat and Sarnat (1976)[26] - Becher et al. (2007)[32] | Neonates destined to develop neonatal encephalopathy had higher rates of nonreactive fetal heart rate tracing before labor (OR = 49.0 95% CI 5.4 to 11.09 p<0.001).  There was no significant difference in the acute onset of bradycardia between neonatal encephalopathy and control group.  Among neonatal encephalopathy group admitted to labor, higher rates of suspicious or ominous fetal heart rate (13/19 [68%] versus 9/92 [10%], p<0.001, OR: 19.9 (6.2-64.0) p<0.001) was observed. |
| Hayes  (2013) | - Cases with neonatal hypoxic-ischemic encephalopathy: n=226 - Controls: n=428 | - Intrapartum | Time domain  Parameters   - Bradycardia   Classification   - Unsatisfactory   Satisfactory | Definition is given  One assessor | Not specified | Encephalopathy:   - Sarnat and Sarnat (1976)[26] | A unsatisfactory fetal heart rate tracing was statistically significant higher in hypoxic-ischemic encephalopathy group. (OR (3.76 (2.35-6.02) p<0.001).  Fetal bradycardia was independently association with hypoxic-ischemic encephalopathy (aOR: 2.63 (1.44-4.79) p<0.002). |
| Martinez-Biarge (2013) | - Cases with neonatal hypoxic-ischemic encephalopathy: n=356 - Controls: n=205 | - Intrapartum | Time domain  Classification  Abnormal | Definition is given  Assessor not specified | Not specified | Hypoxic-ischemic encephalopathy:   - Poor condition at birth (5-minute Apgar score ,5 and/or arterial cord blood pH ,7.1 and/or need for major resuscitation), AND - Neonatal encephalopathy (Volpe (2001)[33], Leviton (1992)[34]) | Abnormal intrapartum CTG were significantly more prevalent in cases than in controls (77 vs 21%; OR 12.6 (8.3-19.1).  Abnormal CTG remained significantly and independently associated with hypoxic-ischemic encephalopathy (OR: 12.75 (6.8-23.5). |
| Continues | | | | | | | |
| **Table S8. Continued** | | | | | | |
| **First author (year)** | **Included participants** | **Fetal heart rate** | | | **Hypoxic-ischemic encephalopathy** | | **Results** |
| **Time of assessment** | **Metrics** | **Guideline for classification**  **# Assessor(s)** | **Time of assessment** | **Definition** |
| Graham  (2014) | - Cases with hypoxic-ischemic encephalopathy treated with whole-body hypothermia: n=39 - Controls: n=78 | Intrapartum: last hour prior to delivery | Time domain  Parameters   - Baseline - Accelerations - Reactivity - Decelerations (late, variable, early) - Variability   Classification   - Category I - Category II   Category III | - NICHD - ACOG (2009)[23]   Three assessors | At birth | Hypoxic-ischemic encephalopathy:   - Sarnat and Sarnat (1976)[26]   AND   - < 1 hour pH 7.0 or base deficit > 16 mmol.   OR   - pH 7.01–7.15 and base deficit 10–15.9 mmol , evidence of an acute sentinel event , 10 min Apgar < 5 or need for assisted ventilation initiated at birth with continuation for at least 10 minutes. | There was no statistically significant difference in tracing category between the encephalopathy group and controls.  The encephalopathy group was significantly more likely to be reactive during the hour prior to delivery (p=0.047) and had an increased number of late decelerations (p=0.01). The measurement of total deceleration area debt 30 and debt 60 were significantly increased in the neonatal encephalopathy group (p=0.008, p=0.003).  There was a significantly increased odds ratio for decreased early decelerations and increased debt 30 and debt 60 in the encephalopathy group (OR: 0.58 (0.35-0.94) p=0.03, OR:1.00 (1.00-1.00) p=0.01, OR: 1.00 (1.00-1.00) p=0.005).    For the detection of cases using significant variables from the multivariable logistic regression, the area under the ROC curve ranged from 0.66–0.72 and the sensitivity from 23.1–35.9%. |
| Soncini  (2014) | n=314  (incl. 11 cases with hypoxic-ischemic encephalopathy) | Intrapartum: last hour prior to delivery (extended to maximum of 5h before delivery) | Time domain  Classification   - Category I - Category II A/B - Category III | - ACOG (2010)[12] - NICHD (2008)[2]   One assessor | Not specified | Encephalopathy:   - Criteria of Sarnat and Sarnat (1976)[26], modified by Fenichel (1983)[27] | All infants with neonatal hypoxic-ischemic encephalopathy had either Category III (25.8%) or Category IIB tracings (5.3%). (p<0.001)  Only one case of moderate/severe hypoxic-ischemic encephalopathy occurred among infants with Category IIB tracings (1.8%), while there were four cases (12.1%) among those with Category III tracings. |
| Torbenson  (2017) | - Cases with hypoxic-ischemic encephalopathy: n=25 - Controls: n=101 | Intrapartum, first hour after admission and last hour prior to delivery | Time domain  Classification   - Category I - Category II - Category III | NICHD (2008)  Two assessors | Within 1 week of birth | Hypoxic-ischemic encephalopathy   - born at ≥ 350/7 with disturbed neurological function manifested by subnormal consciousness, level difficult initiating or maintaining respiration, abnormal tone and reflexes, or seizures. - Apgar score < 5 at 5 min   AND/OR   - umbilical cord artery acidemia (pH < 7.1 or base excess ≥ 12 mmol/L)   AND/OR   - neuroimaging evidence of acute brain injury based on MRI or computed tomography. | Cases were more likely to have presence of at least one category 3 segment in any of the four 15-min segments in the last hour before delivery (28.0% vs. 4.0%, p = 0.002).  The distribution of the predominant category for each tracing during the first hour after admission was not significantly different between hypoxic-ischemic encephalopathy cases and controls (p = 0.20)  The predominant category rating was higher for the hypoxic-ischemic encephalopathy cases compared to controls during the last hour prior to delivery (p = 0.02) (Table 3).  Fetal heart rate tracings for both cases and controls tended to progress from category 1 to category 2 from admission to delivery. |
| Continues | | | | | | | |

| **Table S8. Continued** | | | | | | |
| --- | --- | --- | --- | --- | --- | --- |
| **First author (year)** | **Included participants** | **Fetal heart rate** | | | **Hypoxic-ischemic encephalopathy** | | **Results** |
| **Time of assessment** | **Metrics** | **Guideline for classification**  **# Assessor(s)** | **Time of assessment** | **Definition** |
| Barrois  (2019) | - Cases with hypoxic-ischemic encephalopathy: n=32 - Controls: n=147 | Intrapartum | Time domain  Parameters   - Variability - Bradycardia   Classification   - Abnormal | FIGO (2015)  One assessor | Not specified | Encephalopathy   - Sarnat and Sarnat [26] | After review of all fetal heart rate tracings, only decreased variability was a significant risk factor for hypoxic-ischemic encephalopathy (68.7% vs. 44.2%, p =0.01, aOR: 2.8 (1.1 – 6.9))  The rates of abnormal fetal heart rate, bradycardia, bradycardia duration did not differ between hypoxic-ischemic encephalopathy and no hypoxic-ischemic encephalopathy group. |
| Michaeli  (2021) | - Cases with hypoxic-ischemic encephalopathy treated by therapeutic hypothermia: n=33 - Controls: n=100 | Intrapartum: last hour prior to delivery, 10 minute epochs | Time domain  Parameters   - baseline - variability - accelerations - decelerations   Classification   - Category I - Category II - Category III | NICHD  Two assessors | Less than 12 hours of birth | Not specified | Category 3 tracing was prevalent solely in the hypoxic-ischemic encephalopathy- therapeutic hypothermia group, 27.2% vs. 0%, p < 0.001.  Electronic fetal monitoring features significantly higher in the hypoxic-ischemic encephalopathy- therapeutic hypothermia group were:   - mean baseline heart rate p < 0.05 - indeterminate baseline p < 0.001 - tachycardia p < 0.05 - bradycardia p < 0.001 - tachysystole p < 0.05 - late decelerations p < 0.001 - decreased variability, p < 0.001   Electronic fetal monitoring features significantly lower in the hypoxic-ischemic encephalopathy- therapeutic hypothermia group were:   - accelerations p < 0.001   No significant difference in the number of variable decelerations p = 0.96, prolonged decelerations p = 0.40, mean area of decelerations p = 0.949, the total area of decelerations p = 0.166, or duration of decelerations p = 0.974 was found.  We found that electronic fetal monitoring parameters most predictive of the hypoxic-ischemic encephalopathy- therapeutic hypothermia were: indeterminate baseline heart rate OR = 47.297, 95% CI (8.17–273.76) p < 0.001, bradycardia OR = 15.997 95% CI (4.18–61.18) p < 0.001, low variability OR = 10.224, 95% CI (2.71–38.45) p < 0.001, higher baseline of the fetal heart rate calculated for each increment of 1 BPM OR = 1.0547, 95% CI (1.001–1.116) p = 0.047, increased risk for the hypoxic-ischemic encephalopathy- therapeutic hypothermia. |
| Continues | | | | | | | |

| **Table S8. Continued** | | | | | | |
| --- | --- | --- | --- | --- | --- | --- |
| **First author (year)** | **Included participants** | **Fetal heart rate** | | | **Hypoxic-ischemic encephalopathy** | | **Results** |
| **Time of assessment** | **Metrics** | **Guideline for classification**  **# Assessor(s)** | **Time of assessment** | **Definition** |
| Vargas-Calixto (2021) | - Cases with hypoxic-ischemic encephalopathy: n=163 - Controls: n=21,853 | Intrapartum, last 6 hours prior birth into 20 min epochs | Time domain  Parameters   - mean heart rate - standard deviation   Frequency domain  Parameters   - low frequency - movement frequency - high frequency - power ratio   Nonlinear domain  Parameters   - approximate entropy - deceleration capacity | Definitions provided  Software | Not specified | Hypoxic-ischemic encephalopathy:   - blood pH < 7 or base deficit > 9 mmol/L - clinical evidence of encephalopathy | Four features showed significant difference in distribution between normal and hypoxic-ischemic encephalopathy: approximate entropy, mean heart rate, standard deviation and deceleration capacity.  Considering the temporal evolution of fetal heart rate features approximate entropy, the standard deviation, and deceleration capacity showed a promising ability to detect risk of hypoxic-ischemic encephalopathy as early as 120 minutes before birth.  Also there was a small increase in the high frequency of the normal class during the last 120 minutes before birth. |
| di Pasquo  (2022) | n=431  (incl. 61 cases with hypoxic-ischemic encephalopathy) | Intrapartum, from labor onset till delivery | Time domain    Classification hypoxia   - Acute - Subacute - Gradually evolving - Chronic (antepartum) | Physiological CTG interpretation (2018)[18]  Three assessors | Not specified | Encephalopathy:   - Sarnat and Sarnat (1976)[26] | The incidence of moderate- to- severe hypoxic-ischemic encephalopathy in fetuses with chronic (antepartum) hypoxia was higher than the cases of intrapartum hypoxia (58.9 vs. 12.3%; P < 0.001). |
| Continues | | | | | | | |

| **Table S8. Continued** | | | | | | |
| --- | --- | --- | --- | --- | --- | --- |
| **First author (year)** | **Included participants** | **Fetal heart rate** | | | **Hypoxic-ischemic encephalopathy** | | **Results** |
| **Time of assessment** | **Metrics** | **Guideline for classification**  **# Assessor(s)** | **Time of assessment** | **Definition** |
| Reynolds  (2022) | - Cases with hypoxic-ischemic encephalopathy: n=52 - Controls: n=118 | Intrapartum, 15 minute segments | Time domain  Parameters   - Baseline - Variability - Acceleration - Deceleration - Bradycardia - Sinusoidal pattern   Classification   - Uninterpretable - Normal - Suspicious - Pathological | NICE  One assessor -> manually + software | Not specified | Encephalopathy:   - Sarnat and Sarnat (1976)[26] | The mean, maximum and rate above 160 bpm of the baseline were statistically significantly higher in hypoxic-ischemic encephalopathy cases than in controls.   - Mean: AUC: 0.66 (0.57-0.75), Sens: 52%, Spec: 81% - Maximum: AUC: 0.70 (0.61-0.79), Sens 58%, Spec: 83% - Any > 160 bpm AUC: 0.70 (0.61-0.79), Sens 58%, Spec: 83%   The maximum number of consecutive segments in which the baseline was >160 bpm, > 140 bpm, and variability < 5bpm was statistically significantly higher in hypoxic-ischemic encephalopathy cases than in controls.   - Baseline > 160 bpm: AUC: 0.71 (0.62-0.80) Sens: 58%, Spec: 83% - Baseline > 140 bpm: AUC: 0.67 (0.58-0.76) Sens: 42%, Spec: 86% - Variability < 5 bpm: AUC: 0.64 (0.55-0.73) Sens: 31%, Spec: 92%   Minimum variability and accelerations were statistically significantly lower in hypoxic-ischemic encephalopathy cases than in controls.   - Minimum variability: AUC: 0.63 (0.54-0.72) Sens: 73%, Spec: 49% - Accelerations: AUC 0.67 (0.58-0.76) Sens: 71% Spec: 64%   Total number of variable, deep/prolonged variable and late decelerations were statistically significantly higher in hypoxic-ischemic encephalopathy cases than in controls.   - Variable: AUC: 0.62 (0.53-0.71) Sens: 67%, Spec: 57% - Deep/prolonged variable: AUC 0.61 (0.52-0.71) Sens: 50%, Spec: 71% - Late: AUC: 0.56 (0.46-0.65) Sens: 19%. Spec:92%   The rate of suspicious and pathological category tracing was statistically significantly higher in hypoxic-ischemic encephalopathy cases compared to controls.   - Suspicious: AUC: 0.67 (0.59-0.76) Sens: 85%, Spec: 50% - Pathological: AUC 0.67 (0.58-0.76) Sens: 60%, Spec: 74%   The total, suspicious and pathological number of segments were significantly higher in hypoxic-ischemic encephalopathy cases than in controls.   - Total: AUC: 0.61 (0.51-0.71) Sens: 69%, Spec: 57% - Suspicious: AUC: 0.76 (0.67-0.84) Sens: 65%, Spec: 81% - Pathological: AUC 0.68 (0.59-0.77) Sens: 60%, Spec: 74% |
| Continues | | | | | | | |

| **Table S8. Continued** | | | | | | |
| --- | --- | --- | --- | --- | --- | --- |
| **First author (year)** | **Included participants** | **Fetal heart rate** | | | **Hypoxic-ischemic encephalopathy** | | **Results** |
| **Time of assessment** | **Metrics** | **Guideline for classification**  **# Assessor(s)** | **Time of assessment** | **Definition** |
| Reynolds  (2022) | - Cases with hypoxic-ischemic encephalopathy: n=52 - Controls: n=118 | Intrapartum, 15 minute segments | Time domain  Parameters   - Baseline - Variability - Acceleration - Deceleration - Bradycardia - Sinusoidal pattern   Classification   - Uninterpretable - Normal - Suspicious - Pathological | NICE  One assessor -> manually + software | Not specified | Encephalopathy:   - Sarnat and Sarnat (1976)[26] | The presence of normal category tracing was statistically significantly lower and the presence of suspicious and pathological category tracing was statistically significantly higher in hypoxic-ischemic encephalopathy cases compared to controls.   - Normal: AUC: 0.31 (0.22-0.40) Sens: 8%, Spec: 92% - Suspicious: AUC: 0.74 (0.66-0.83) Sens: 63%, Spec: 76% - Pathological: AUC 0.67 (0.58-0.76) Sens: 60%, Spec: 74%   Analysis based on the number of suspicious segments was more predictive of hypoxic-ischemic encephalopathy than analysis based on the simple presence of absence of suspicious segments. (c-statistic: 0.76 versus 0.67, P < 0.001).  The first two fetal heart rate segments following delivery suite admission were classified as abnormal in more cases than controls (p<0.001).  A tri-variate logistic regression model incorporating the total number of segments, the number of “suspicious” segments classed, and the number of “pathological” segments achieved an area under the curve of 0.78 (95% confidence interval: 0.70–0.86). With 95% specificity, this model correctly identified 17 cases (33%) at a median time before delivery of 2 hours and 18 minutes (interquartile range: 01:19–04:40). |
| Geva  (2023) | Singleton, low risk pregnancies after 34 weeks of gestation   - Cases with suspected hypoxic-ischemic encephalopathy: n=62 - Controls: n=123 | Intrapartum, 2 hour prior to delivery at least 60 min of recording, 10 min epochs | Time domain  Parameters   - Acceleration (duration, depth, minimum maximum, AUC) - Deceleration (duration, depth, minimum maximum, total) | ACOG (2009)  Clark (2017)  Martí  Gamboa (2017)  Assessor is not specified | Not specified | Hypoxic-ischemic encephalopathy   - History of a complicated delivery, defined as an obstetrical event occurring around birth, or a pathologic fetal monitoring (fetal bradycardia), or a post- delivery 5- min APGAR score <5 or cord pH <7.0, or a prolonged post- delivery neonatal resuscitation with positive pressure ventilation; - Clinical encephalopathy with a depressed cerebral activity or seizures per amplitude integrated EEG with signs of non- central nervous system hypoxic ischemic involvement | Total deceleration AUC, deceleration depth, and the 10- minute mean deceleration AUC were all significantly larger in the encephalopathy group (P = 0.03, P < 0.01, P = 0.02, respectively).  The acceleration- to- deceleration ratio was significantly higher in the control group (0.09, IQR 0.02– 0.25) compared with the encephalopathy group (0.04, IQR 0.00– 0.12) (P < 0.01).  Maximum and minimum deceleration depths/heights were found to be significantly higher in the encephalopathy group (P ≤ 0.01), though total deceleration duration was not significantly different between the groups. Accelerations were more prevalent in the control group (93.5% vs. 82.3%; P = 0.03). Total acceleration AUC and the 10- min mean acceleration AUC were both significantly higher in the control group (P = 0.04). |
| Abbreviations: ACOG, the American College of Obstetricians and Gynecologists; aOR, adjusted odd ratio; aRR, adjusted risk ratio; AUC, area under the curve; bpm, beats per minute; CI, 95% confidence interval; CTG, cardiotocography; EEG, electroencephalography ; FIGO, The International Federation of Gynecology and Obstetrics; inc, including; min, minute; mmol, millimol; MRI, magnetic resonance imaging; NICE, the National Institute for Health and Care Excellence; NICHD, the National Institute of Child Health and Human Development; NPV, negative predictive value; OR, odd ratio; pH, potential of hydrogen; PPV, positive predictive value; RCOG, royal college of obstetricians and gynaecologists; ROC, receiver operating characteristic; Sens, sensitivity; Spec, specificity; vs, versus. | | | | | | | |

**References**

[1] Caldeyro-Barcia R: Control of the human fetal heart rate during labor. *The heart and circulation of the newborn and infant* 1966: 7-36.

[2] Robinson B, Nelson L: A review of the proceedings from the 2008 NICHD workshop on standardized nomenclature for cardiotocography: update on definitions, interpretative systems with management strategies, and research priorities in relation to intrapartum electronic fetal monitoring. *Reviews in Obstetrics and Gynecology* 2008;1(4): 186.

[3] Camm AJ, Malik M, Bigger JT, Breithardt G, Cerutti S, Cohen RJ, et al.: Heart rate variability: standards of measurement, physiological interpretation and clinical use. Task Force of the European Society of Cardiology and the North American Society of Pacing and Electrophysiology. *Circulation* 1996;93(5): 1043-1065.

[4] Chatow UDI, Davidson S, Reichman BL, Akselrod S: Development and maturation of the autonomic nervous system in premature and full-term infants using spectral analysis of heart rate fluctuations. *Pediatric research* 1995;37(3): 294-302.

[5] Smith SL, Doig AK, Dudley WN: Characteristics of heart period variability in intubated very low birth weight infants with respiratory disease. *Neonatology* 2004;86(4): 269-274.

[6] Schwartz PJ, Garson Jr A, Paul T, Stramba-Badiale M, Vetter VL, Villain E, Wren C: Guidelines for the interpretation of the neonatal electrocardiogram. *European heart journal* 2002;23(17): 1329-1344.

[7] Laborde S, Mosley E, Thayer JF: Heart rate variability and cardiac vagal tone in psychophysiological research–recommendations for experiment planning, data analysis, and data reporting. *Frontiers in psychology* 2017;8: 213.

[8] Doyle OM, Korotchikova I, Lightbody G, Marnane W, Kerins D, Boylan GB: Heart rate variability during sleep in healthy term newborns in the early postnatal period. *Physiological measurement* 2009;30(8): 847.

[9] Goulding RM, Stevenson NJ, Murray DM, Livingstone V, Filan PM, Boylan GB: Heart rate variability in hypoxic ischemic encephalopathy: correlation with EEG grade and 2-y neurodevelopmental outcome. *Pediatric research* 2015;77(5): 681-687.

[10] Temko A, Doyle O, Murray D, Lightbody G, Boylan G, Marnane W: Multimodal predictor of neurodevelopmental outcome in newborns with hypoxic-ischaemic encephalopathy. *Computers in biology and medicine* 2015;63: 169-177.

[11] Munyaw Y, Urdal J, Ersdal H, Ngarina M, Moshiro R, Blacy L, Linde JE: Fetal to Neonatal Heart Rate Transition during Normal Vaginal Deliveries: A Prospective Observational Study. *Children* 2023;10(4).

[12] American College of O, Gynecologists: Practice bulletin no. 116: Management of intrapartum fetal heart rate tracings. *Obstetrics and gynecology* 2010;116(5): 1232-1240.

[13] Fetal Heart Rate Monitoring: Guidelines of the American College of Obstetricians and Gynecologists. *Technical Bulletin* 1975;Number 32.

[14] Manning FA, Baskett TF, Morrison I, Lange I: Fetal biophysical profile scoring: a prospective study in 1,184 high-risk patients. *American Journal of Obstetrics and Gynecology* 1981;140(3): 289-294.

[15] Haverkamp AD, Orleans M, Langendoerfer S, McFee J, Murphy J, Thompson HE: A controlled trial of the differential effects of intrapartum fetal monitoring. *American journal of obstetrics and gynecology* 1979;134(4): 399-412.

[16] Parer JT: National Institute of Child Health and Human Development Research Planning Workshop. Electronic fetal heart rate monitoring: Research guidelines for interpretation. *Am J Obstet Gynecol* 1997;177: 1385-1390.

[17] Hon EH, Quilligan EJ: The classification of fetal heart rate. II. A revised working classification. *Connecticut medicine* 1967;31(11): 779-784.

[18] Chandraharan E, Evans S, Krueger D, Pereira S, Skivens S, Zaima A. Physiological CTG Interpretation. Intrapartum fetal monitoring guideline. 2018.

[19] Papile L-A, Burstein J, Burstein R, Koffler H: Incidence and evolution of subependymal and intraventricular hemorrhage: a study of infants with birth weights less than 1,500 gm. *J Pediatr* 1978;92(4): 529-534.

[20] Fischer W SI, Brandt H: Ein Vorschlag zur Beurteilung des antepartalen Kardiotokogramms. *Geburtshilfe Perinatology* 1976(180): 117–123.

[21] Strauss A, Kirz D, Modanlou HD, Freeman RK: Perinatal events and intraventricular/subependymal hemorrhage in the very low-birth weight infant. *American journal of obstetrics and gynecology* 1985;151(8): 1022-1027.

[22] Perlman JM, Rollins N, Burns D, Risser R: Relationship between periventricular intraparenchymal echodensities and germinal matrix-intraventricular hemorrhage in the very low birth weight neonate. *Pediatrics* 1993;91(2): 474-480.

[23] Macones GA: Intrapartum fetal heart rate monitoring: nomenclature, interpretation, and general management principles. *Obstetrics and gynecology* 2009;114(1): 192-202.

[24] Vohr B, Ment LR: Intraventricular hemorrhage in the preterm infant. *Early human development* 1996;44(1): 1-16.

[25] Käär K: Antepartal cardiotocography in the assessment of fetal outcome. *Acta Obstetricia et Gynecologica Scandinavica* 1980;59(sup94): 2-56.

[26] Sarnat HB, Sarnat MS: Neonatal encephalopathy following fetal distress: a clinical and electroencephalographic study. *Arch Neurol* 1976;33(10): 696-705.

[27] Fenichel GM: Hypoxic-ischemic encephalopathy in the newborn. *Archives of neurology* 1983;40(5): 261-266.

[28] Pressler RM, Boylan GB, Morton M, Binnie CD, Rennie JM: Early serial EEG in hypoxic ischaemic encephalopathy. *Clinical neurophysiology* 2001;112(1): 31-37.

[29] Parer JT, Ikeda T: A framework for standardized management of intrapartum fetal heart rate patterns. *American journal of obstetrics and gynecology* 2007;197(1): 26. e21-26. e26.

[30] Badawi N, Kurinczuk JJ, Keogh JM, Alessandri LM, O'Sullivan F, Burton PR, et al.: Antepartum risk factors for newborn encephalopathy: the Western Australian case-control study. *Bmj* 1998;317(7172): 1549-1553.

[31] Boylan P: 5 Intrapartum fetal monitoring. *Bailliere's clinical obstetrics and gynaecology* 1987;1(1): 73-95.

[32] Becher JC, Stenson BJ, Lyon AJ: Is intrapartum asphyxia preventable? *BJOG: An International Journal of Obstetrics & Gynaecology* 2007;114(11): 1442-1444.

[33] Volpe JJ. Hypoxic-ischemic encephalopathy: clinical aspects. In: Volpe JJ, ed. Neurology of the Newborn.: Philadelphia, PA: Elsevier. 2001: 400–404.

[34] Leviton A, Nelson KB: Problems with definitions and classifications of newborn encephalopathy. *Pediatric neurology* 1992;8(2): 85-90.
